# Supplementary material
Source: publisher figshare collection journal article supplement (https://acs.figshare.com/ndownloader/files/4752034)
Supplement: Supplementary file 1 [file 4752034]

## **Supporting Information**

### **Reductive Aldol Coupling of Divinyl Ketones *via* Rhodium Catalyzed Hydrogenation: *syn*-Diastereoselective Construction of $\beta$ -Hydroxyenones**

Soo Bong Han and Michael J. Krische\*

*University of Texas at Austin,  
Department of Chemistry and Biochemistry,  
Austin, TX 78712*

#### **Table of Contents**

|                                            |            |
|--------------------------------------------|------------|
| <b>I. General Procedure</b>                | <b>S2</b>  |
| <b>II. Procedures and Characterization</b> | <b>S3</b>  |
| <b>III. References</b>                     | <b>S51</b> |

## **I. General Procedure**

**General:** dichloromethane (DCM) was distilled from calcium hydride. Chemical reagents were purchased from Aldrich and Strem Chemicals, Inc. Commercially available aldehydes were purified immediately prior to use.  $\text{Rh}(\text{COD})_2\text{SbF}_6$ <sup>1</sup>,  $\text{Rh}(\text{COD})_2\text{BARF}$ <sup>2</sup> and **1c**<sup>3</sup> were prepared according to the previously reported procedures. Analytical thin-layer chromatography (TLC) was carried out using 0.2-mm commercial silica gel plates (DC-Fertigplatten Kieselgel 60 F<sub>254</sub>). Flash chromatography was performed on silica gel 60 (200-400 mesh). NMR spectra were recorded on a Varian Gemini (300 MHz) spectrometer. <sup>1</sup>H NMR spectra were obtained at 300 MHz. <sup>13</sup>C NMR spectra were obtained at 75 MHz. High resolution mass spectra were obtained on a Micromass ZAB-E spectrometer. FT-IR spectra were obtained using a Nicolet Impact 410 spectrometer. Melting points were obtained on a Thomas-Hoover Unimelt apparatus and are uncorrected.

**General Procedure for the Coupling of Divinyl Ketones and Aldehydes:** To a 13 mm × 100 mm test-tube were added  $\text{Li}_2\text{CO}_3$  (3.9 mg, 0.05 mmol, 10 mol%), (2-Fur)<sub>3</sub>P (13.9 mg, 0.06 mmol, 12 mol%),  $\text{Rh}(\text{COD})_2\text{SbF}_6$  (13.9 mg, 0.025 mmol, 5 mol%), aldehyde (0.5 mmol, 100 mol%) and  $\text{CH}_2\text{Cl}_2$  (0.5 mL, 1.0 M). The test-tube was sealed and the reaction system was purged with Ar(g) followed by H<sub>2</sub>(g) for 20 seconds each. The reaction system was placed under one atmosphere of hydrogen using a balloon and divinyl ketone (1.0 mmol, 200 mol%) was added to the reaction mixture. The reaction mixture was allowed to stir at ambient temperature until consumption of the aldehyde was observed, as revealed by TLC analysis, at which point the reaction mixture was directly deposited onto a column of silica and purified chromatographically ( $\text{SiO}_2$ : EtOAc/hexane) to afford the compound.

## **II. Procedures and Characterizations**

### **Hexa-1,4-dien-3-one (1a)**

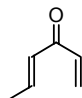

To a solution of hexa-1,4-dien-3-ol<sup>4</sup> (1.0 g, 10.2 mmol, 100 mol%) in CH<sub>2</sub>Cl<sub>2</sub> (50 mL) at 0 °C was added MnO<sub>2</sub> (8.86 g, 101.9 mmol, 999 mol%). The reaction mixture was allowed to stir for 12 hours at ambient temperature, at which point the reaction mixture was filtered through a pad of celite with the aid of Et<sub>2</sub>O. The resulting solution was evaporated and the residue was purified by flash chromatography (SiO<sub>2</sub>: Et<sub>2</sub>O/pentane) to afford the title compound (380 mg, 3.95 mmol) as a viscous yellow solid (39 % yield).

**TLC**: R<sub>f</sub> 0.3 (Et<sub>2</sub>O/pentane, 1/10).

**<sup>1</sup>H NMR** (300 MHz, CDCl<sub>3</sub>): δ 6.96 (dq, *J* = 15.6, 6.9 Hz, 1H), 6.60 (dd, *J* = 17.4, 10.5 Hz, 1H), 6.40 (dq, *J* = 15.6, 1.8 Hz, 1H), 6.28 (dd, *J* = 17.4, 1.5 Hz, 1H), 5.82 (dd, *J* = 10.5, 1.5 Hz, 1H), 1.95 (dd, *J* = 6.9, 1.8 Hz, 3H).

**<sup>13</sup>C NMR** (75 MHz, CDCl<sub>3</sub>): δ 189.6, 144.1, 134.8, 129.7, 128.3, 18.5.

**HRMS** Calcd. for C<sub>6</sub>H<sub>8</sub>O (*M*+1): 97.0653, Found: 97.0653.

**FTIR** (NaCl film): 1666, 1635, 1611, 1443, 1403, 1276, 1216, 1135, 1090, 966, 749.

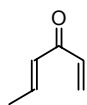

(1a)

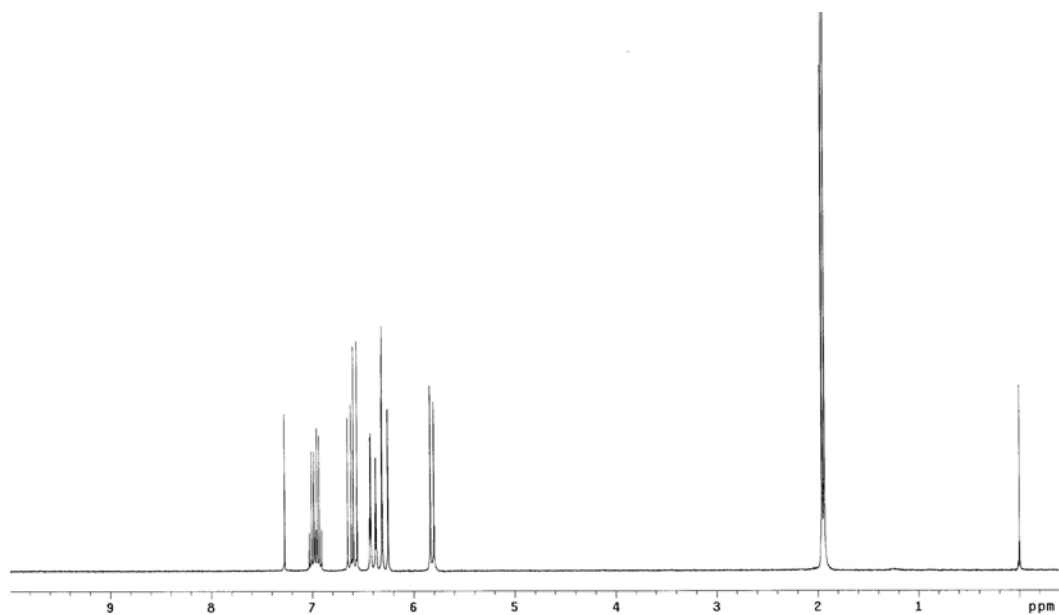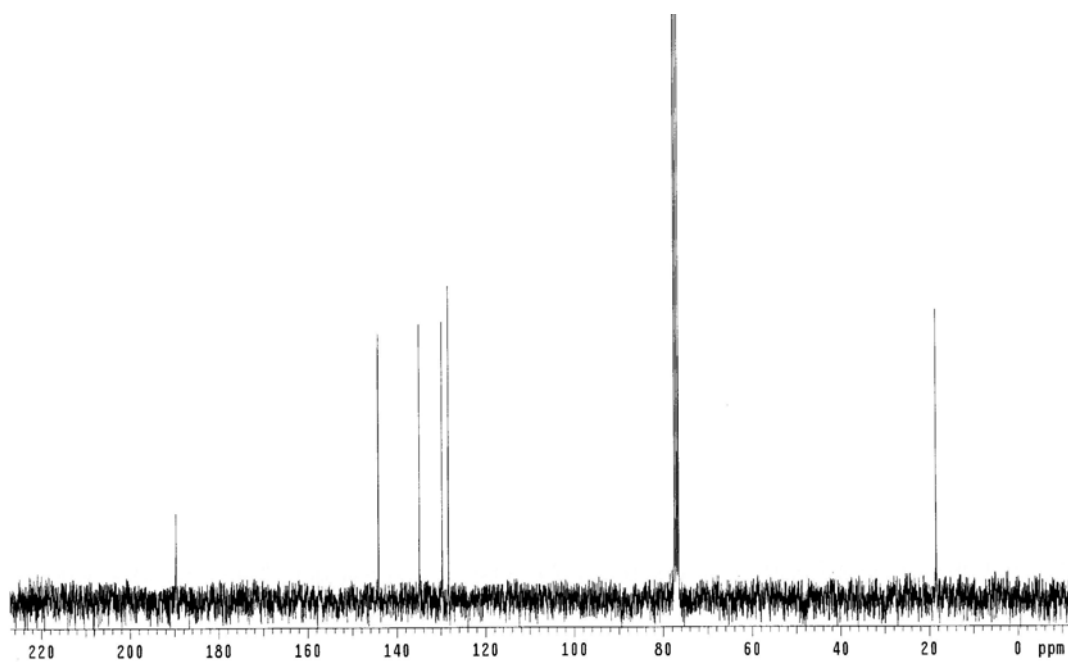

### 1-(4-Nitro-phenyl)-penta-1,4-diene-3-ol

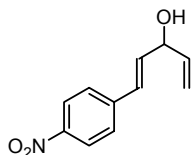

To a solution of vinylmagnesium bromide (1.0 M in THF, 25.6 mL, 25.6 mmol, 113 mol%) was added a solution of 3-(4-nitro-phenyl)-propenal (4.0 g, 22.6 mmol, 100 mol%) in THF (25 mL) at -78 °C. The reaction mixture was allowed to stir for 2 hours at ambient temperature, at which point the reaction mixture was cooled to 0 °C and saturated  $\text{NH}_4\text{Cl}_{(\text{aq.})}$  was added. The reaction mixture was extracted with  $\text{Et}_2\text{O}$  (3 times). The combined organic phases were dried ( $\text{MgSO}_4$ ), filtered, and evaporated. The residue was purified by flash chromatography ( $\text{SiO}_2$ :  $\text{EtOAc}$ /hexane) to afford the title compound (3.33 g, 16.2 mmol) as a yellow solid (72 % yield).

**TLC:**  $R_f$  0.4 ( $\text{EtOAc}$ /hexane, 1/3).

**$^1\text{H NMR}$**  (300 MHz,  $\text{CDCl}_3$ ):  $\delta$  8.20-8.17 (m, 2H), 7.53-7.50 (m, 2H), 6.71 (d,  $J$  = 15.9 Hz, 1H), 6.42 (dd,  $J$  = 15.9, 5.7 Hz, 1H), 5.97 (ddd,  $J$  = 17.1, 10.5, 6.0 Hz, 1H), 5.38 (d,  $J$  = 17.1 Hz, 1H), 5.25 (d,  $J$  = 10.5 Hz, 1H), 4.88 (ddd,  $J$  = 6.0, 5.7, 3.6 Hz, 1H), 1.86 (d,  $J$  = 3.6 Hz, 1H).

**$^{13}\text{C NMR}$**  (75 MHz,  $\text{CDCl}_3$ ):  $\delta$  147.3, 143.4, 138.8, 135.4, 128.5, 127.3, 124.3, 116.6, 73.7.

**HRMS** Calcd. for  $\text{C}_{11}\text{H}_{11}\text{NO}_3$  ( $M+1$ ): 206.0817, Found: 206.0816.

**FTIR** (NaCl film): 3384, 1595, 1513, 1343, 1109, 971, 928, 860, 748  $\text{cm}^{-1}$ .

**M.P.:** 50-51 °C.

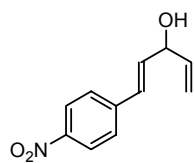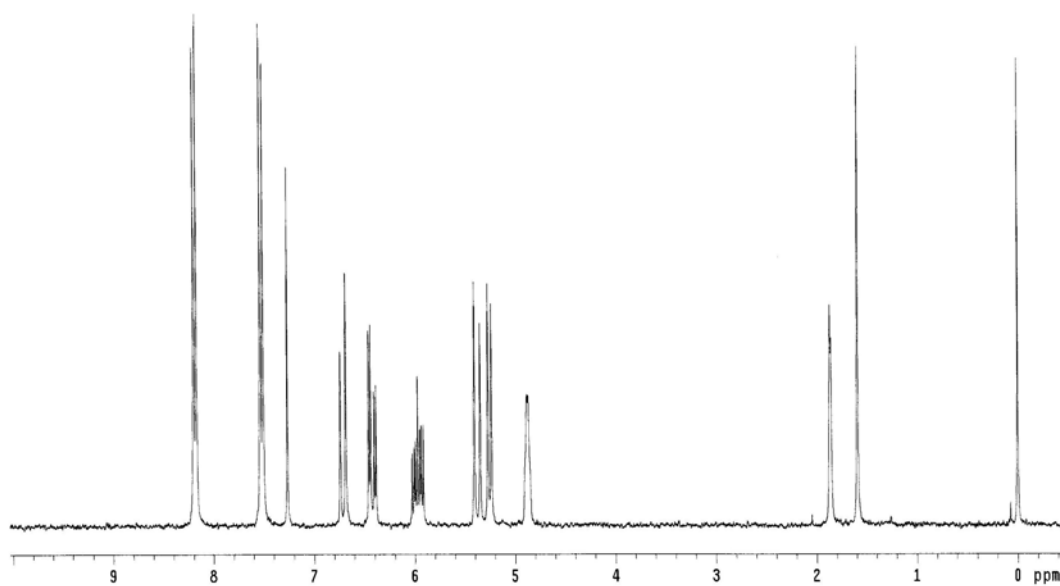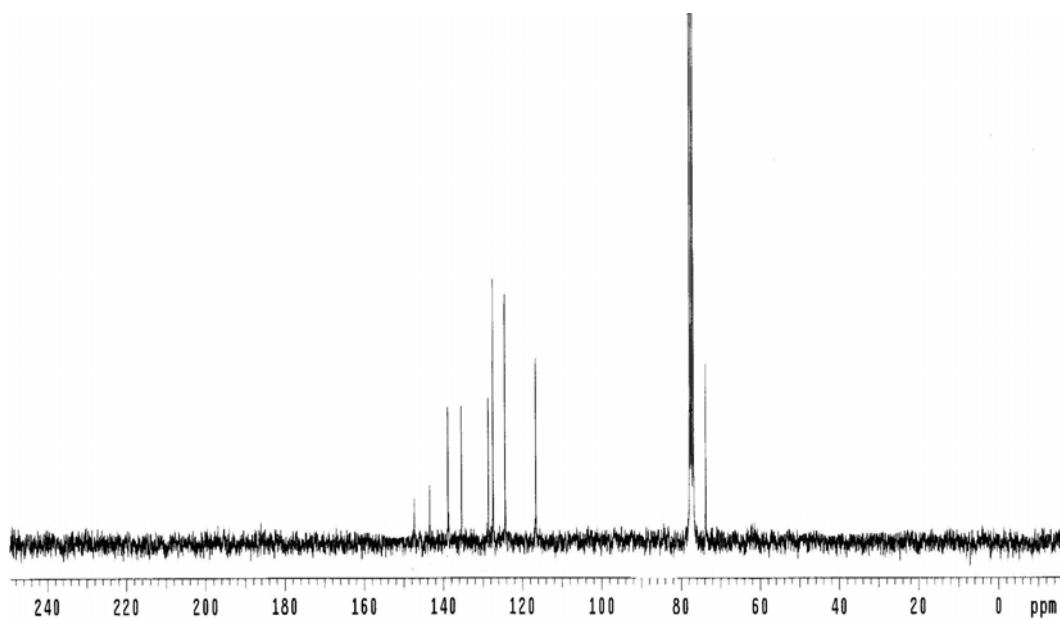

**1-(4-Nitro-phenyl)-penta-1,4-dien-3-one (1b)**

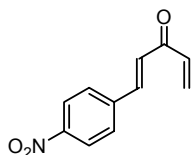

To a solution of 1-(4-nitro-phenyl)-penta-1,4-diene-3-ol (1.89 g, 9.21 mmol, 100 mol%) in CH<sub>2</sub>Cl<sub>2</sub> (50 mL) at 0 °C was added MnO<sub>2</sub> (8.00 g, 92.1 mmol, 1000 mol%). The reaction mixture was allowed to stir for 12 hours at ambient temperature, at which point the reaction mixture was filtered through a pad of celite with the aid of Et<sub>2</sub>O. The resulting solution was evaporated and the residue was purified by flash chromatography (SiO<sub>2</sub>: EtOAc/hexane) to afford the title compound (590 mg, 2.90 mmol) as a yellow solid (32 % yield).

**TLC:** R<sub>f</sub> 0.3 (EtOAc/hexane, 1/7).

**<sup>1</sup>H NMR** (300 MHz, CDCl<sub>3</sub>): δ 8.28-8.26 (m, 2H), 7.75-7.73 (m, 2H), 7.69 (d, *J* = 12.0 Hz, 1H), 7.13 (d, *J* = 12.0 Hz, 1H), 6.71 (dd, *J* = 12.9, 8.1 Hz, 1H), 6.43 (dd, *J* = 12.9, 0.9 Hz, 1H), 5.98 (dd, *J* = 8.1, 0.9 Hz, 1H).

**<sup>13</sup>C NMR** (75 MHz, CDCl<sub>3</sub>): δ 188.8, 140.8, 140.7, 135.4, 129.7, 128.9, 127.3, 124.2.

**HRMS** Calcd. for C<sub>12</sub>H<sub>14</sub>O<sub>2</sub> (M+1): 204.0661, Found: 204. 0663.

**FTIR** (NaCl film): 2360, 1655, 1592, 1517, 1405, 1345, 1202, 1106, 982, 846 cm<sup>-1</sup>.

**M.P.:** 123-125 °C.

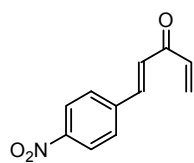

**(1b)**

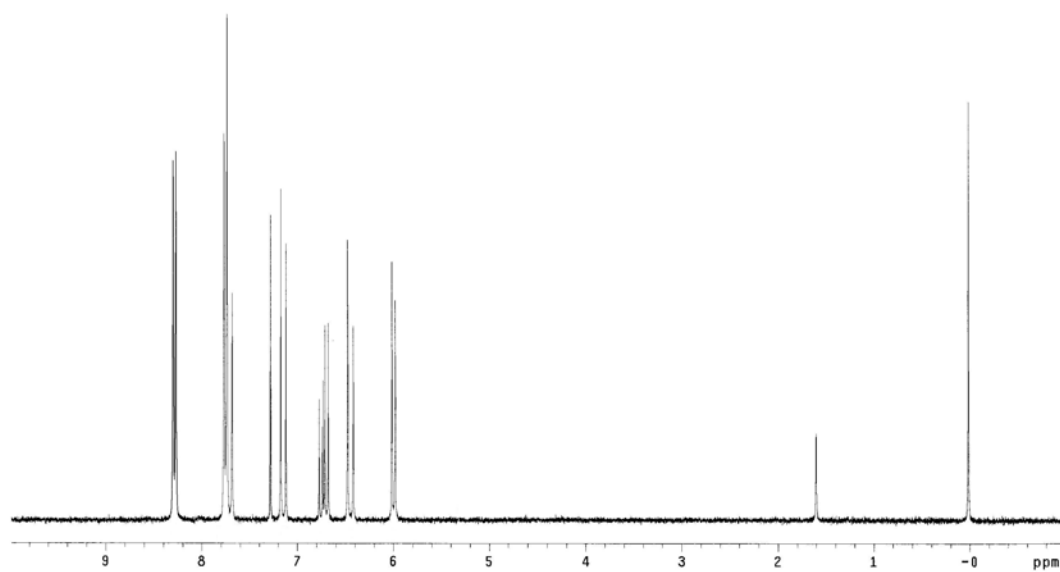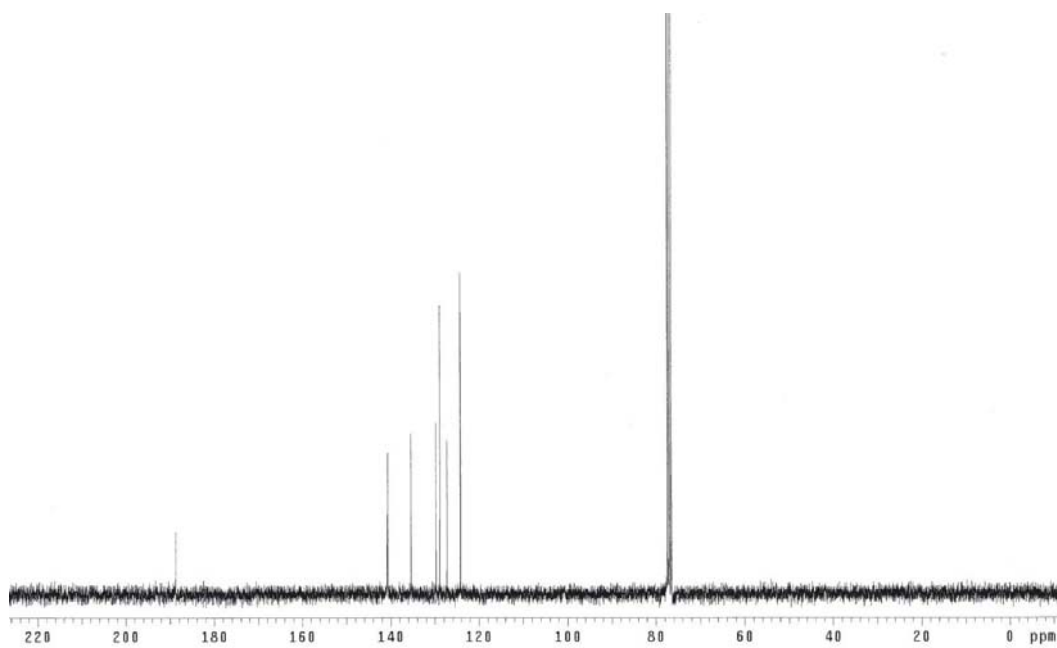



**1-(4-Methoxy-phenyl)-penta-1,4-dien-3-one (1d)**

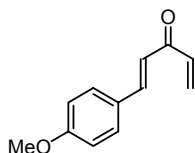

To a solution of 1-(4-methoxy-phenyl)-penta-1,4-dien-3-ol<sup>5</sup> (2.32 g, 12.19 mmol, 100 mol%) in CH<sub>2</sub>Cl<sub>2</sub> (50 mL) at 0 °C was added MnO<sub>2</sub> (10.60 g, 121.95 mmol, 1000 mol%). The reaction mixture was allowed to stir for 12 hours at ambient temperature, at which point the reaction mixture was filtered through a pad of celite with the aid of Et<sub>2</sub>O. The resulting solution was evaporated and the residue was purified by flash chromatography (SiO<sub>2</sub>: EtOAc/hexane) to afford the title compound (1.56 g, 8.29 mmol) as a yellow solid (68 % yield).

**TLC:** R<sub>f</sub> 0.3 (EtOAc/hexane, 1/4).

**<sup>1</sup>H NMR** (300 MHz, CDCl<sub>3</sub>): δ 7.65 (d, *J* = 15.9 Hz, 1H), 7.56-7.53 (m, 2H), 6.94-6.91 (m, 2H), 6.80 (d, *J* = 15.9 Hz, 1H), 6.71 (dd, *J* = 17.4, 10.5 Hz, 1H), 6.36 (dd, *J* = 17.4, 1.5 Hz, 1H), 5.85 (dd, *J* = 10.5, 1.5 Hz, 1H), 3.85 (s, 3H).

**<sup>13</sup>C NMR** (75 MHz, CDCl<sub>3</sub>): δ 189.5, 161.7, 143.8, 135.5, 130.1, 128.1, 127.3, 122.0, 114.4, 55.4.

**HRMS** Calcd. for C<sub>12</sub>H<sub>12</sub>O<sub>2</sub> (M+1): 189.0916, Found: 189.0912.

**FTIR** (NaCl film): 2966, 1652, 1619, 1600, 1571, 1511, 1462, 1423, 1403, 1306, 1255, 1221, 1199, 1173, 1102, 1028, 987, 829 cm<sup>-1</sup>.

**M.P.:** 67-69 °C.

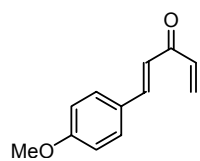

**(1d)**

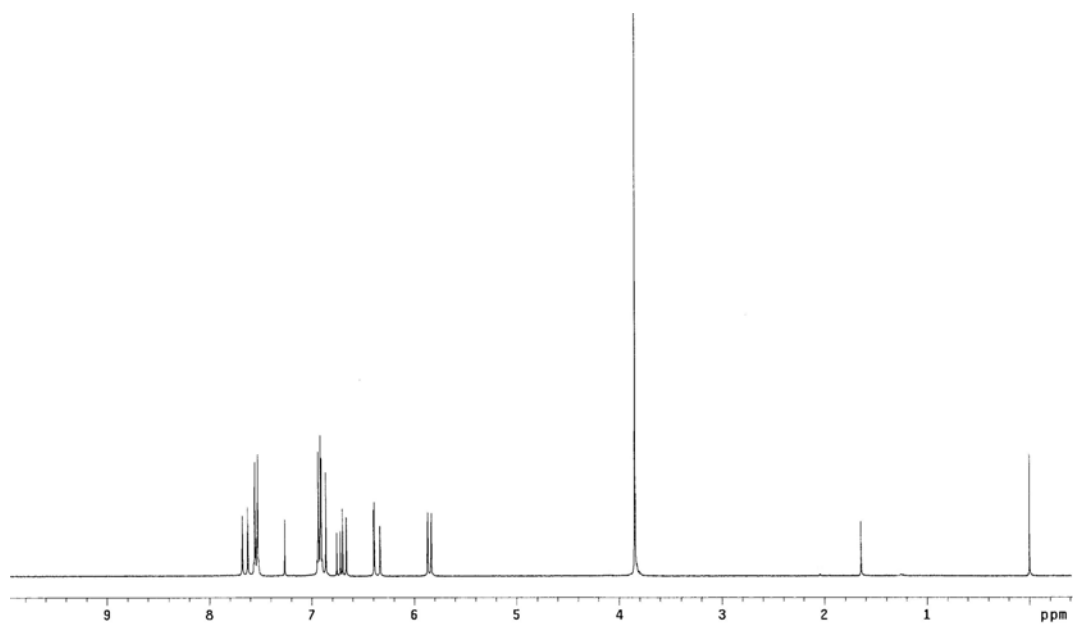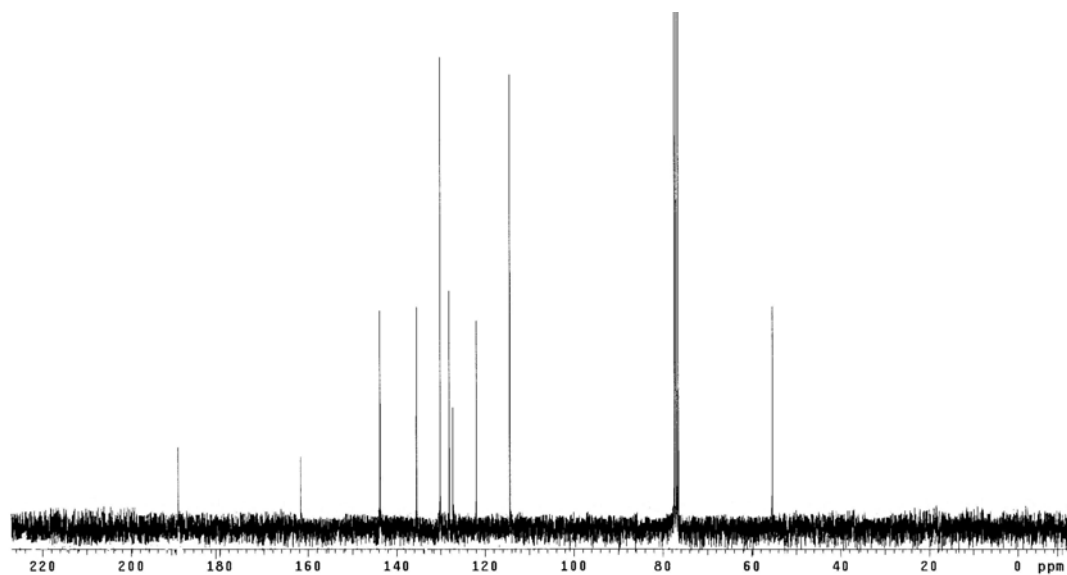

### 1-(4-Dimethylamino-phenyl)-penta-1,4-dien-3-ol

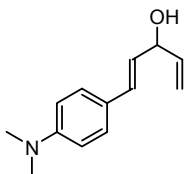

To a solution of vinylmagnesium bromide (1.0 M in THF, 37.1 mL, 37.1 mmol, 130 mol%) was added a solution of 3-(4-dimethylamino-phenyl)-propenal (5.0 g, 28.5 mmol, 100 mol%) in THF (25 mL) at -78 °C. The reaction mixture was allowed to stir for 2 hours at ambient temperature, at which point the reaction mixture was cooled to 0 °C and saturated  $\text{NH}_4\text{Cl}_{(\text{aq.})}$  was added. The reaction mixture was extracted with  $\text{Et}_2\text{O}$  (3 times). The combined organic phases were dried ( $\text{MgSO}_4$ ), filtered, and evaporated. The residue was purified by flash chromatography ( $\text{SiO}_2$ :  $\text{EtOAc}$ /hexane) to afford the title compound (4.29 g, 21.1 mmol) as a viscous yellow oil (74 % yield).

**TLC:**  $R_f$  0.3 ( $\text{EtOAc}$ /hexane, 1/4).

**$^1\text{H NMR}$**  (300 MHz,  $\text{CDCl}_3$ ):  $\delta$  7.29-7.26 (m, 2H), 6.68-6.66 (m, 2H), 6.52 (d,  $J$  = 15.9 Hz, 1H), 6.03 (dd,  $J$  = 15.9, 7.2 Hz, 1H), 5.99 (ddd,  $J$  = 17.4, 10.5, 5.7 Hz, 1H), 5.32 (d,  $J$  = 17.4 Hz, 1H), 5.17 (d,  $J$  = 10.5 Hz, 1H), 4.77 (dd,  $J$  = 7.2, 5.7 Hz, 1H), 2.96 (s, 6H).

**$^{13}\text{C NMR}$**  (75 MHz,  $\text{CDCl}_3$ ):  $\delta$  150.2, 139.7, 131.3, 127.5, 125.9, 124.8, 114.9, 112.3, 74.3, 40.4.

**HRMS** Calcd. for  $\text{C}_{13}\text{H}_{17}\text{NO}$  (M): 203.1310, Found: 203.1312.

**FTIR** (NaCl film): 3362, 2885, 2360, 1609, 1521, 1444, 1354, 1229, 1186, 1166, 965, 946, 805, 668  $\text{cm}^{-1}$ .

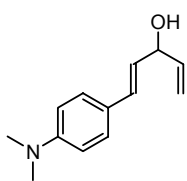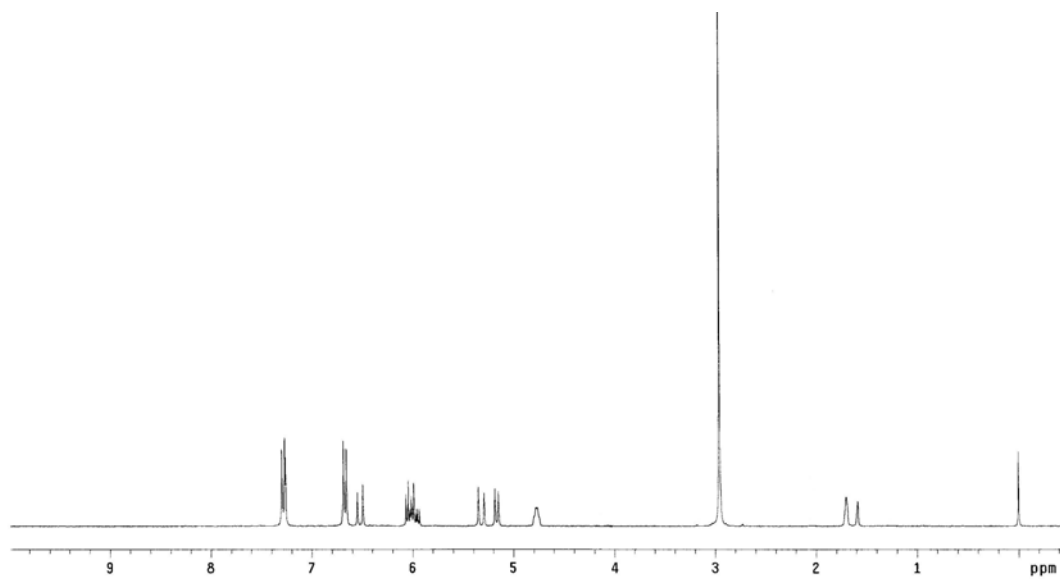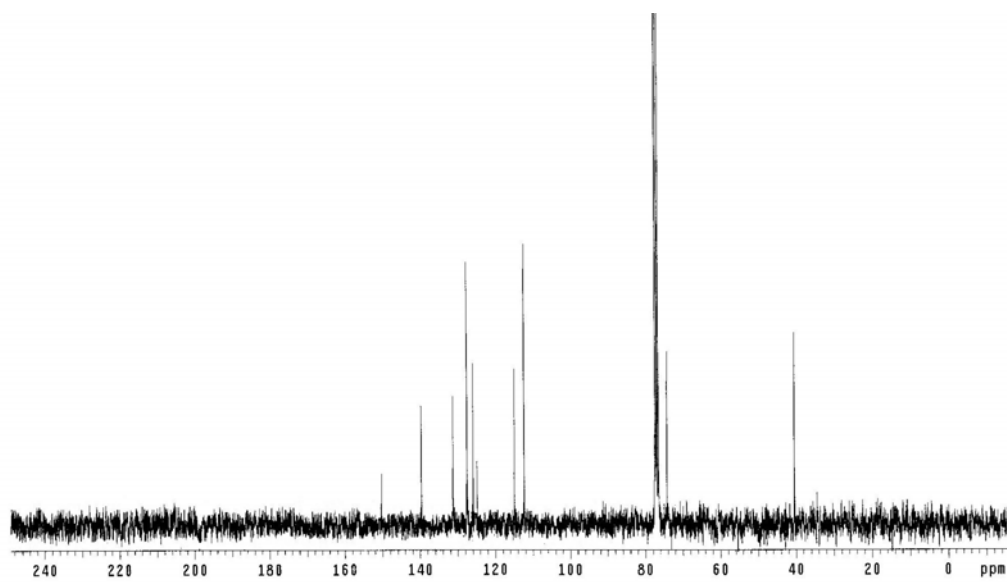

**1-(4-Dimethylamino-phenyl)-penta-1,4-dien-3-one (1e)**

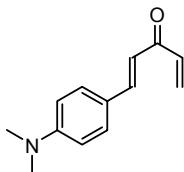

To a solution of 1-(4-dimethylamino-phenyl)-penta-1,4-dien-3-ol (2.12 g, 10.43 mmol, 100 mol%) in  $\text{CH}_2\text{Cl}_2$  (50 mL) at 0 °C was added  $\text{MnO}_2$  (9.06 g, 104.30 mmol, 1000 mol%). The reaction mixture was allowed to stir for 12 hours at ambient temperature, at which point the reaction mixture was filtered through a pad of celite with the aid of  $\text{Et}_2\text{O}$ . The resulting solution was evaporated and the residue was purified by flash chromatography ( $\text{SiO}_2$ :  $\text{EtOAc}$ /hexane) to afford the title compound (1.47 g, 7.30 mmol) as a red solid (70 % yield).

**TLC:**  $R_f$  0.3 ( $\text{EtOAc}$ /hexane, 1/3).

**$^1\text{H NMR}$**  (300 MHz,  $\text{CDCl}_3$ ):  $\delta$  7.64 (d,  $J$  = 15.9 Hz, 1H), 7.48-7.45 (m, 2H), 6.79 (d,  $J$  = 15.9 Hz, 1H), 6.68 (dd,  $J$  = 17.4, 10.5 Hz, 1H), 6.67-6.64 (m, 2H), 6.33 (dd,  $J$  = 17.4, 1.5 Hz, 1H), 5.77 (dd,  $J$  = 10.5, 1.5 Hz, 1H), 3.01 (s, 6H).

**$^{13}\text{C NMR}$**  (75 MHz,  $\text{CDCl}_3$ ):  $\delta$  189.3, 152.0, 144.8, 135.6, 130.2, 127.1, 119.4, 111.7, 40.0.

**HRMS** Calcd. for  $\text{C}_{13}\text{H}_{15}\text{NO}$  ( $\text{M}+1$ ): 202.1232, Found: 202.1231.

**FTIR** (NaCl film): 2916, 1648, 1605, 1572, 1522, 1455, 1226, 985, 814  $\text{cm}^{-1}$ .

**M.P.:** 95-96 °C.

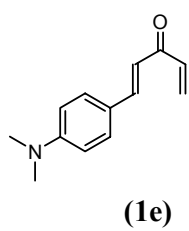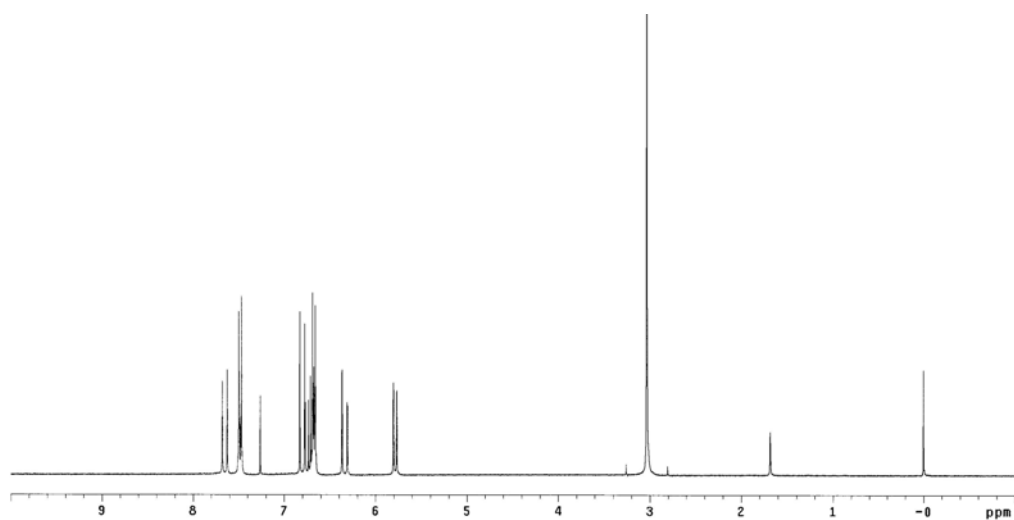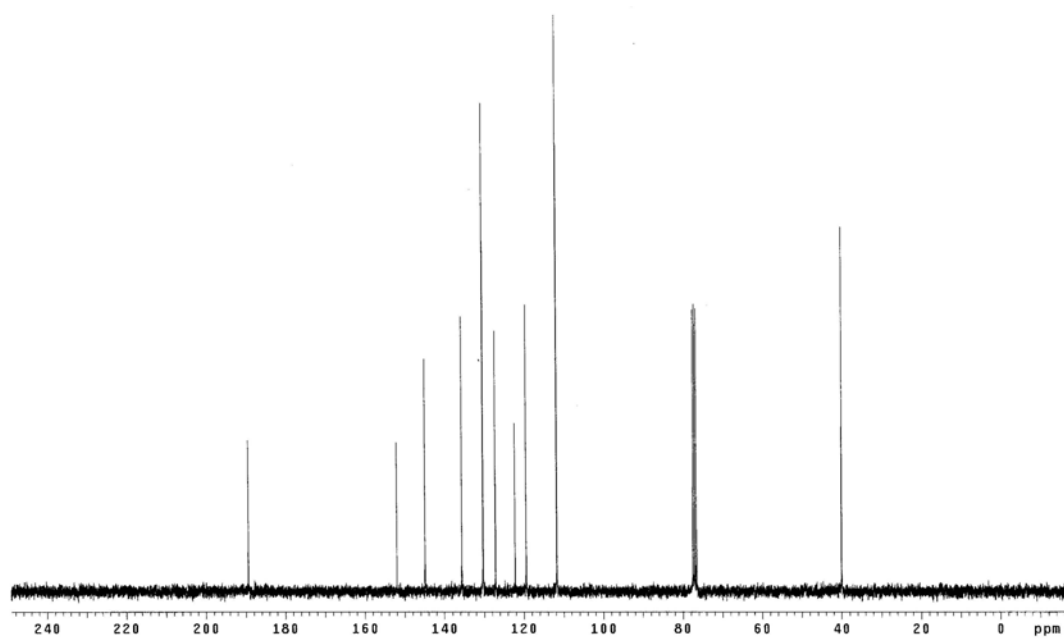

### 1-Hydroxy-2-methyl-1-(4-nitro-phenyl)-hex-4-en-3-one (3a)

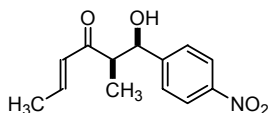

To a 13 mm × 100 mm test-tube were added  $\text{Li}_2\text{CO}_3$  (3.9 mg, 0.05 mmol, 10 mol%), (2-Fur) $_3\text{P}$  (13.9 mg, 0.06 mmol, 12 mol%),  $\text{Rh}(\text{COD})_2\text{SbF}_6$  (13.9 mg, 0.025 mmol, 5 mol%), 4-nitro-benzaldehyde (75.6 mg, 0.5 mmol, 100 mol%) and  $\text{CH}_2\text{Cl}_2$  (0.5 mL, 1.0 M). The test-tube was sealed and the reaction system was purged with  $\text{Ar}(\text{g})$  and  $\text{H}_2(\text{g})$  for 20 seconds each. The reaction system was placed under one atmosphere of hydrogen using a balloon and hexa-1,4-dien-3-one (96.1 mg, 1.0 mmol, 200 mol%) was added to the reaction mixture. The reaction mixture was allowed to stir at ambient temperature for 7 hours, at which point the reaction mixture was directly deposited onto a column of silica and purified chromatographically ( $\text{SiO}_2$ : EtOAc/hexane) to afford the title compound (102 mg, 0.41 mmol) as a viscous yellow oil (82 % yield).

**TLC:**  $R_f$  0.3 (EtOAc/hexane, 1/3).

**$^1\text{H NMR}$**  (300 MHz,  $\text{CDCl}_3$ ):  $\delta$  8.22-8.19 (m, 2H), 7.55-7.52 (m, 2H), 6.99 (dq,  $J$  = 15.6, 6.9 Hz, 1H), 6.19 (dq,  $J$  = 15.6, 1.8 Hz, 1H), 5.24 (d,  $J$  = 2.7 Hz, 1H), 3.93 (br, 1H), 3.03 (dq,  $J$  = 7.2, 2.7 Hz, 1H), 1.95 (dd,  $J$  = 6.9, 1.8 Hz, 3H), 1.03 (d,  $J$  = 7.2 Hz, 3H).

**$^{13}\text{C NMR}$**  (75 MHz,  $\text{CDCl}_3$ ):  $\delta$  204.2, 149.3, 147.0, 145.3, 130.0, 126.7, 123.3, 71.9, 48.8, 18.3, 10.1.

**HRMS** Calcd. for  $\text{C}_{13}\text{H}_{15}\text{NO}_4$  (M): 250.1079; Found: 250.1082.

**FTIR** (NaCl film): 3461, 2975, 2937, 2369, 1683, 1651, 1624, 1605, 1519, 1441, 1375, 1347, 1201, 1108, 1056, 970, 854, 749, 707, 668  $\text{cm}^{-1}$ .

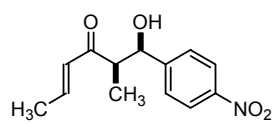

**(3a)**

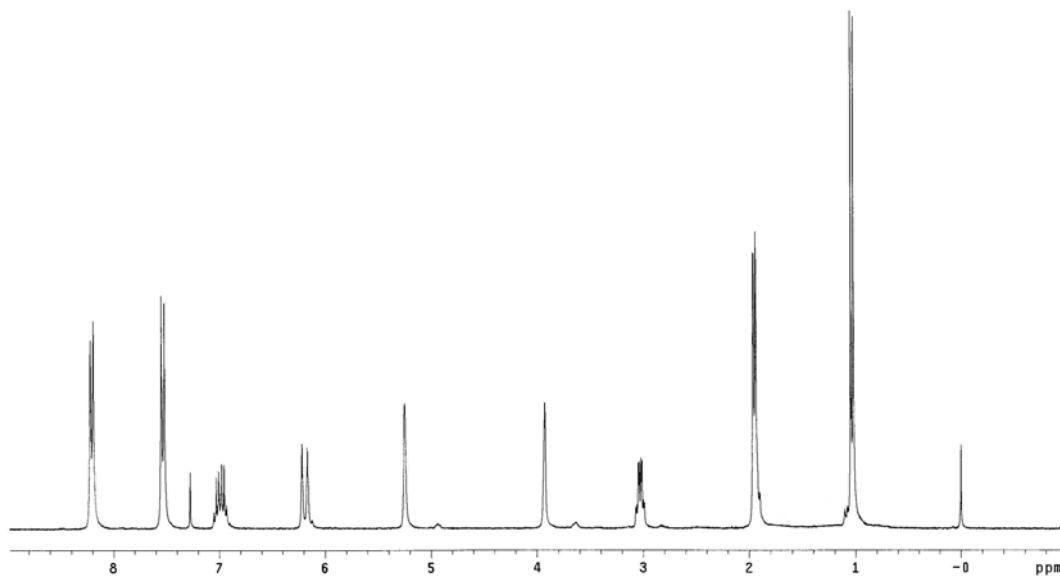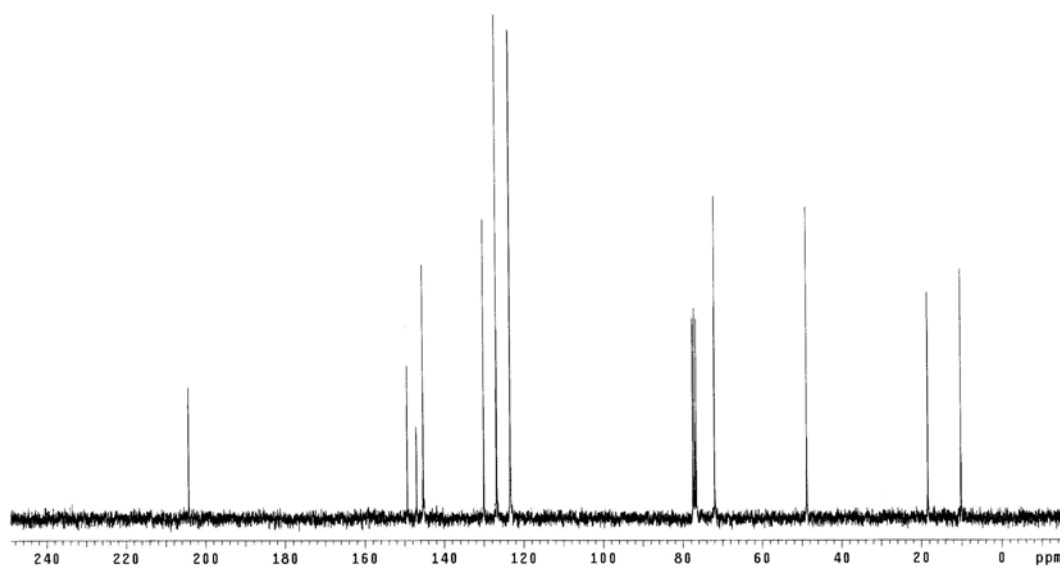



### 7-Benzyloxy-6-hydroxy-5-methyl-hept-2-en-4-one (3b)

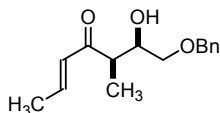

To a 13 mm × 100 mm test-tube were added  $\text{Li}_2\text{CO}_3$  (3.9 mg, 0.05 mmol, 10 mol%), (2-Fur) $_3\text{P}$  (13.9 mg, 0.06 mmol, 12 mol%),  $\text{Rh}(\text{COD})_2\text{SbF}_6$  (13.9 mg, 0.025 mmol, 5 mol%), benzyloxy-acetaldehyde (75.1 mg, 0.5 mmol, 100 mol%) and  $\text{CH}_2\text{Cl}_2$  (0.5 mL, 1.0 M). The test-tube was sealed and the reaction system was purged with  $\text{Ar}(\text{g})$  and  $\text{H}_2(\text{g})$  for 20 seconds each. The reaction system was placed under one atmosphere of hydrogen using a balloon and hexa-1,4-dien-3-one (96.1 mg, 1.0 mmol, 200 mol%) was added to the reaction mixture. The reaction mixture was allowed to stir at ambient temperature for 7 hours, at which point the reaction mixture was directly deposited onto a column of silica and purified chromatographically ( $\text{SiO}_2$ : EtOAc/hexane) to afford the title compound (99 mg, 0.40 mmol) as a viscous yellow oil (80 % yield).

**TLC:**  $R_f$  0.3 (EtOAc/hexane, 1/3).

**$^1\text{H NMR}$**  (300 MHz,  $\text{CDCl}_3$ ):  $\delta$  7.37-7.26 (m, 5H), 6.91 (dq,  $J = 15.6, 6.9$  Hz, 1H), 6.16 (dq,  $J = 15.6, 1.5$  Hz, 1H), 4.52 (s, 2H), 4.04-4.14 (m, 1H), 3.53-3.41 (m, 2H), 3.01 (dq,  $J = 7.2, 5.4$  Hz, 1H), 2.91 (d,  $J = 3.3$  Hz, 1H), 1.90 (dd,  $J = 6.9, 1.5$  Hz, 3H), 1.16 (d,  $J = 7.2$  Hz, 3H).

**$^{13}\text{C NMR}$**  (75 MHz,  $\text{CDCl}_3$ ):  $\delta$  203.6, 143.9, 137.8, 130.8, 128.4, 127.7, 73.3, 71.5, 70.6, 45.0, 18.3, 11.8.

**HRMS** Calcd. for  $\text{C}_{12}\text{H}_{20}\text{O}_3$  ( $M+1$ ): 249.1491, Found: 249.1497.

**FTIR** (NaCl film): 3447, 2912, 2360, 1654, 1626, 1453, 1374, 1101, 970, 738, 698, 668  $\text{cm}^{-1}$ .

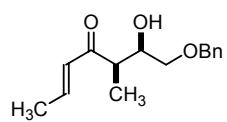

**(3b)**

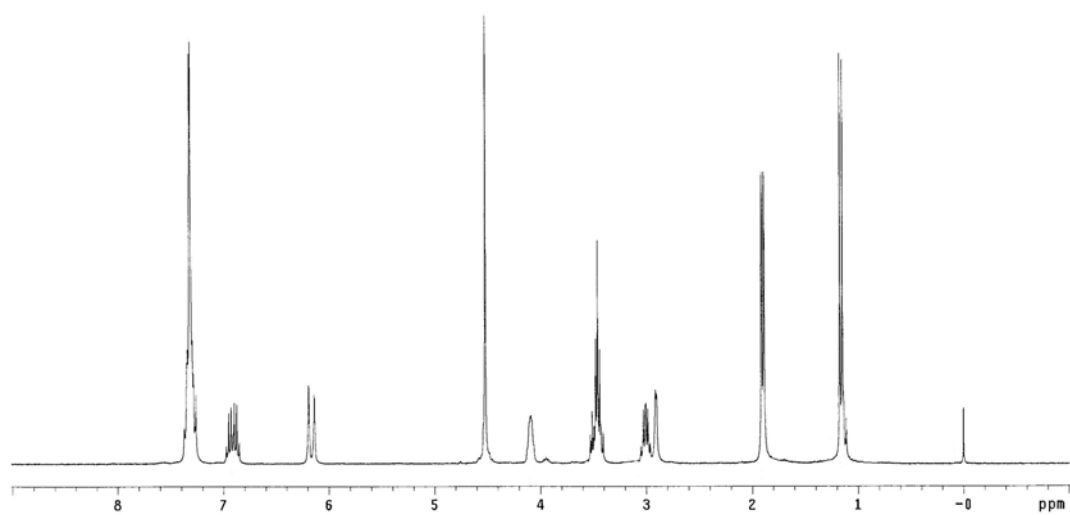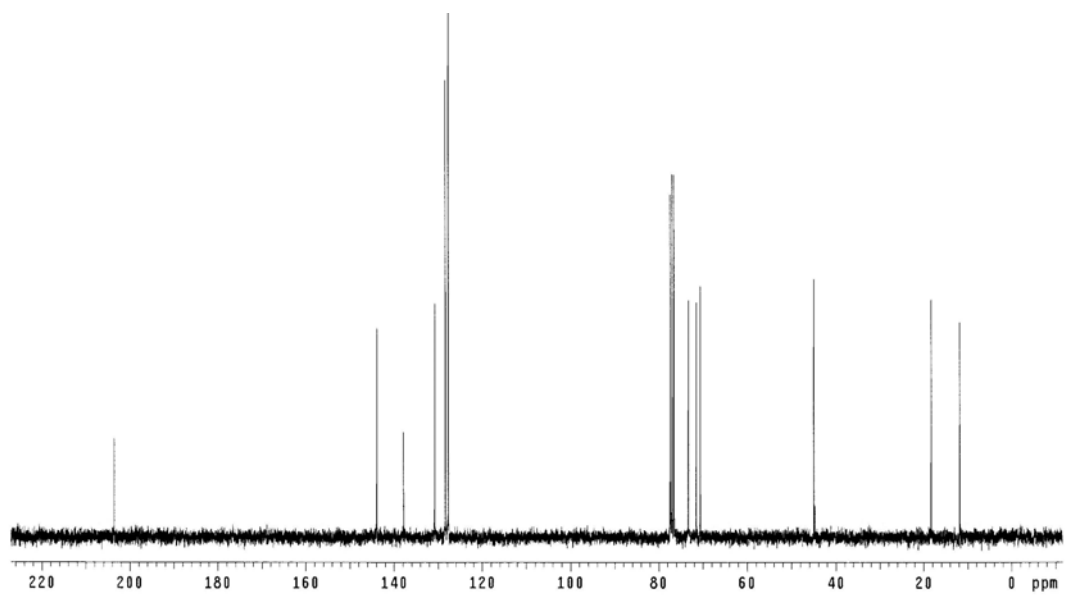

### 2-(2-Hydroxy-3-methyl-4-oxo-hept-5-enyl)-isoindole-1,3-dione (3c)

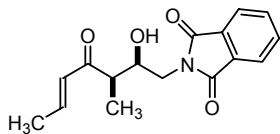

To a 13 mm × 100 mm test-tube were added  $\text{Li}_2\text{CO}_3$  (3.9 mg, 0.05 mmol, 10 mol%),  $(2\text{-Fur})_3\text{P}$  (13.9 mg, 0.06 mmol, 12 mol%),  $\text{Rh}(\text{COD})_2\text{SbF}_6$  (13.9 mg, 0.025 mmol, 5 mol%), (1,3-dioxo-1,3-dihydro-isoindol-2-yl)-acetaldehyde (94.6 mg, 0.5 mmol, 100 mol%) and  $\text{CH}_2\text{Cl}_2$  (0.5 mL, 1.0 M). The test-tube was sealed and the reaction system was purged with  $\text{Ar}(\text{g})$  and  $\text{H}_2(\text{g})$  for 20 seconds each. The reaction system was placed under one atmosphere of hydrogen using a balloon and hexa-1,4-dien-3-one (96.1 mg, 1.0 mmol, 200 mol%) was added to the reaction mixture. The reaction mixture was allowed to stir at ambient temperature for 7 hours, at which point the reaction mixture was directly deposited onto a column of silica and purified chromatographically ( $\text{SiO}_2$ : EtOAc/hexane) to afford the title compound (122 mg, 0.42 mmol) as a white solid (85 % yield).

**TLC:**  $R_f$  0.3 (EtOAc/hexane, 1/3).

**$^1\text{H NMR}$**  (300 MHz,  $\text{CDCl}_3$ ):  $\delta$  7.87-7.84 (m, 2H), 7.74-7.33 (m, 2H), 6.92 (dq,  $J = 15.6, 6.9$  Hz, 1H), 6.19 (d,  $J = 15.6$  Hz, 1H), 4.32-4.22 (m, 1H), 3.87 (dd,  $J = 14.1, 4.5$  Hz, 1H), 3.73 (dd,  $J = 14.1, 7.8$  Hz, 1H), 3.26 (br, 1H), 2.88 (m, 1H), 1.91 (d,  $J = 6.9$  Hz, 3H), 1.29 (d,  $J = 7.2$  Hz, 3H).

**$^{13}\text{C NMR}$**  (75 MHz,  $\text{CDCl}_3$ ):  $\delta$  203.2, 168.5, 144.3, 134.0, 131.9, 130.1, 123.3, 69.5, 45.8, 41.3, 18.3, 11.0.

**HRMS** Calcd. for  $\text{C}_{16}\text{H}_{17}\text{NO}_4$  ( $M+1$ ): 288.1236, Found: 288.1234.

**FTIR** (NaCl film): 3472, 2937, 2360, 1772, 1712, 1625, 1431, 1395, 1190, 1034, 969, 714  $\text{cm}^{-1}$ .

**M.P.:** 110-112  $^\circ\text{C}$ .

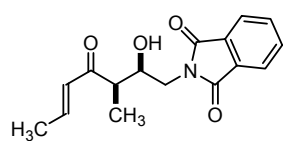

**(3c)**

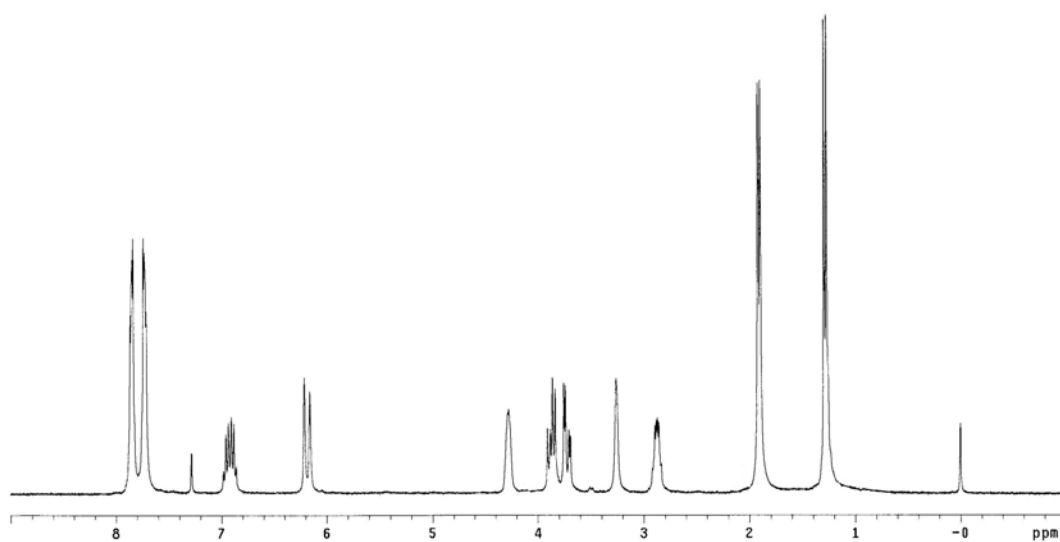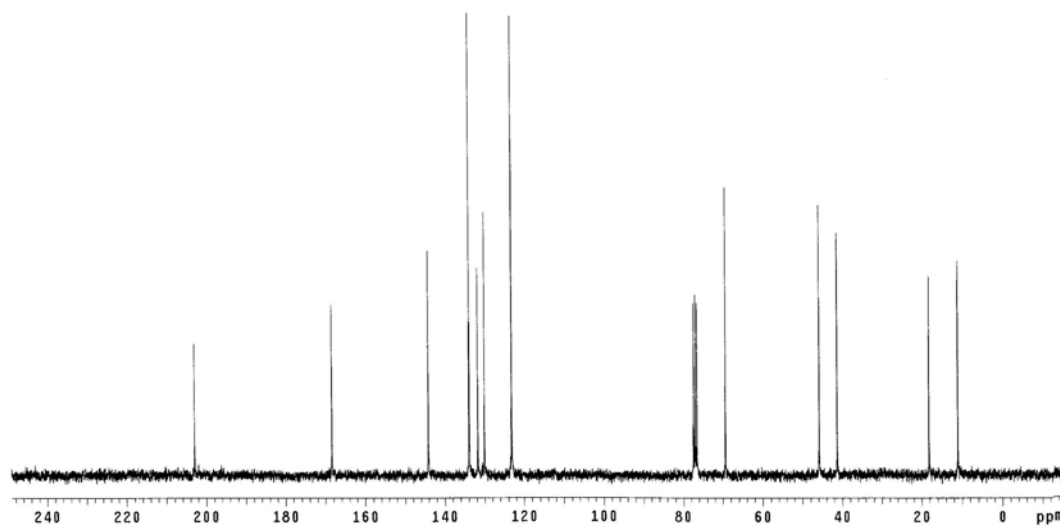

**1-(6-Bromo-pyridin-2-yl)-1-hydroxy-2-methyl-hex-4-en-3-one (3d)**

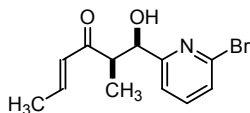

To a 13 mm × 100 mm test-tube were added  $\text{Li}_2\text{CO}_3$  (3.9 mg, 0.05 mmol, 10 mol%),  $(2\text{-Fur})_3\text{P}$  (13.9 mg, 0.06 mmol, 12 mol%),  $\text{Rh}(\text{COD})_2\text{SbF}_6$  (13.9 mg, 0.025 mmol, 5 mol%), 6-bromo-pyridine-2-carbaldehyde (93.0 mg, 0.5 mmol, 100 mol%) and  $\text{CH}_2\text{Cl}_2$  (0.5 mL, 1.0 M). The test-tube was sealed and the reaction system was purged with  $\text{Ar}(\text{g})$  and  $\text{H}_2(\text{g})$  for 20 seconds each. The reaction system was placed under one atmosphere of hydrogen using a balloon and hexa-1,4-dien-3-one (96.1 mg, 1.0 mmol, 200 mol%) was added to the reaction mixture. The reaction mixture was allowed to stir at ambient temperature for 7 hours, at which point the reaction mixture was directly deposited onto a column of silica and purified chromatographically ( $\text{SiO}_2$ : EtOAc/hexane) to afford the title compound (134 mg, 0.47 mmol) as a viscous yellow oil (94 % yield).

**TLC:**  $R_f$  0.5 (EtOAc/hexane, 1/2).

**$^1\text{H NMR}$**  (300 MHz,  $\text{CDCl}_3$ ):  $\delta$  7.59-7.48 (m, 2H), 7.38-7.35 (m, 2H), 6.99 (dq,  $J = 15.6, 6.9$  Hz, 1H), 6.20 (dq,  $J = 15.6, 1.5$  Hz, 1H), 5.12 (dd,  $J = 3.3, 3.3$  Hz, 1H), 4.04 (d,  $J = 3.3$  Hz, 1H), 3.43 (dq,  $J = 6.9, 3.3$  Hz, 1H), 1.93 (dd,  $J = 6.9, 1.5$  Hz, 3H), 1.93 (dd,  $J = 6.9, 1.5$  Hz, 3H), 1.00 (d,  $J = 6.9$  Hz, 3H).

**$^{13}\text{C NMR}$**  (75 MHz,  $\text{CDCl}_3$ ):  $\delta$  204.5, 162.5, 144.8, 140.9, 138.8, 130.1, 126.3, 119.9, 72.8, 47.3, 18.3, 10.3.

**HRMS** Calcd. for  $\text{C}_{12}\text{H}_{14}\text{BrNO}_2$  ( $M+1$ ): 284.0286, Found: 284.0283.

**FTIR** (NaCl film): 3443, 2973, 2935, 2360, 1684, 1653, 1626, 1582, 1555, 1437, 1406, 1375, 1290, 1199, 1157, 1127, 1044, 986, 969, 933, 788, 747, 697  $\text{cm}^{-1}$ .

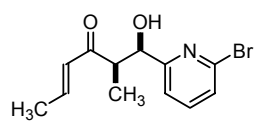

**(3d)**

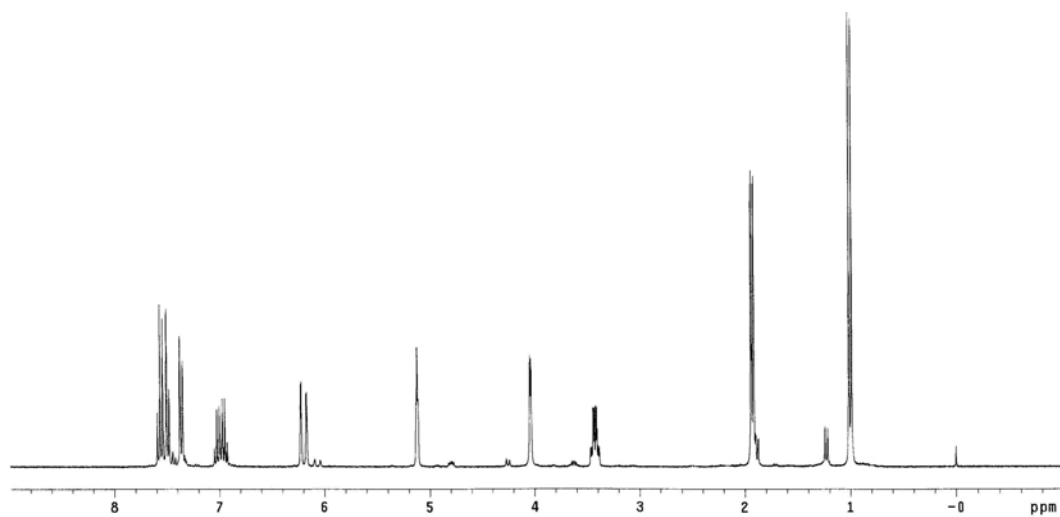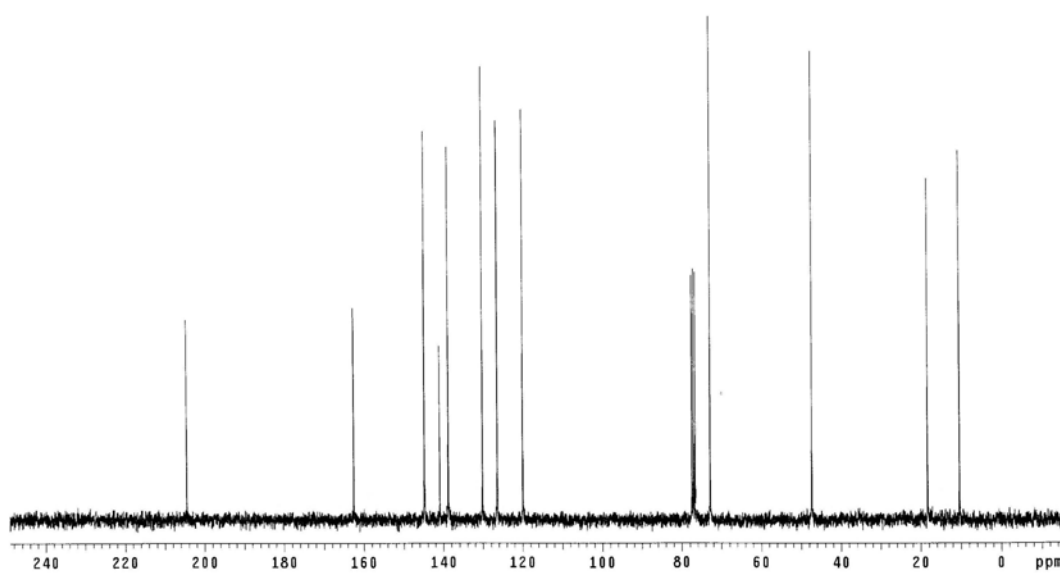

**6-Hydroxy-5-methyl-8-(2-nitro-phenyl)-octa-2,7-dien-4-one (3e)**

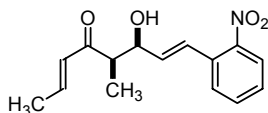

To a 13 mm × 100 mm test-tube were added Li<sub>2</sub>CO<sub>3</sub> (3.9 mg, 0.05 mmol, 10 mol%), (2-Fur)<sub>3</sub>P (13.9 mg, 0.06 mmol, 12 mol%), Rh(COD)<sub>2</sub>SbF<sub>6</sub> (13.9 mg, 0.025 mmol, 5 mol%), 3-(2-nitro-phenyl)-propenal (88.6 mg, 1.0 mmol, 100 mol%) and CH<sub>2</sub>Cl<sub>2</sub> (0.5 mL, 1.0 M). The test-tube was sealed and the reaction system was purged with Ar(g) and H<sub>2</sub>(g) for 20 seconds each. The reaction system was placed under one atmosphere of hydrogen using a balloon and hexa-1,4-dien-3-one (144.2 mg, 1.5 mmol, 300 mol%) was added to the reaction mixture. The reaction mixture was allowed to stir at ambient temperature for 7 hours, at which point the reaction mixture was directly deposited onto a column of silica and purified chromatographically (SiO<sub>2</sub>: EtOAc/hexane) to afford the title compound (103 mg, 0.37 mmol) as a viscous yellow oil (75 % yield).

**TLC:** R<sub>f</sub> 0.3 (EtOAc/hexane, 1/3).

**<sup>1</sup>H NMR** (300 MHz, CDCl<sub>3</sub>): δ 7.94-7.91 (m, 1H), 7.57-7.56 (m, 2H), 7.42-7.26 (m, 1H), 7.10 (d, *J* = 15.9 Hz, 1H), 6.98 (dq, *J* = 14.7, 6.9 Hz, 1H), 6.22 (d, *J* = 14.7 Hz, 1H), 6.16 (dd, *J* = 15.9, 5.7 Hz, 1H), 4.70 (dd, *J* = 5.7, 3.3 Hz, 1H), 3.24 (br, 1H), 3.01 (dq, *J* = 7.5, 3.3 Hz, 1H), 1.95 (d, *J* = 6.9 Hz, 3H), 1.23 (d, *J* = 7.5 Hz, 3H).

**<sup>13</sup>C NMR** (75 MHz, CDCl<sub>3</sub>): δ 204.0, 147.7, 144.6, 134.8, 133.0, 132.6, 130.4, 128.8, 128.0, 126.3, 124.4, 71.8, 47.7, 18.3, 11.1.

**HRMS** Calcd. for C<sub>15</sub>H<sub>17</sub>NO<sub>4</sub> (M+1): 276.1236, Found: 276.1238.

**FTIR** (NaCl film): 3447, 2973, 2933, 2359, 2341, 1685, 1654, 1624, 1570, 1522, 1441, 1345, 1302, 1199, 1042, 967, 860, 785, 742, 668 cm<sup>-1</sup>.

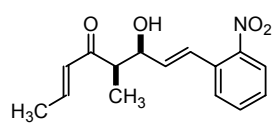

**(3e)**

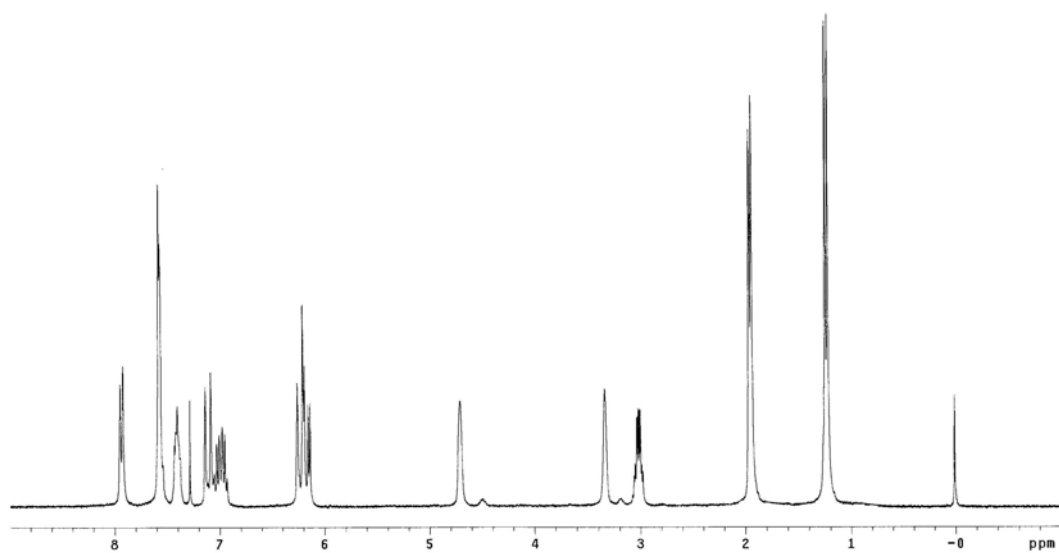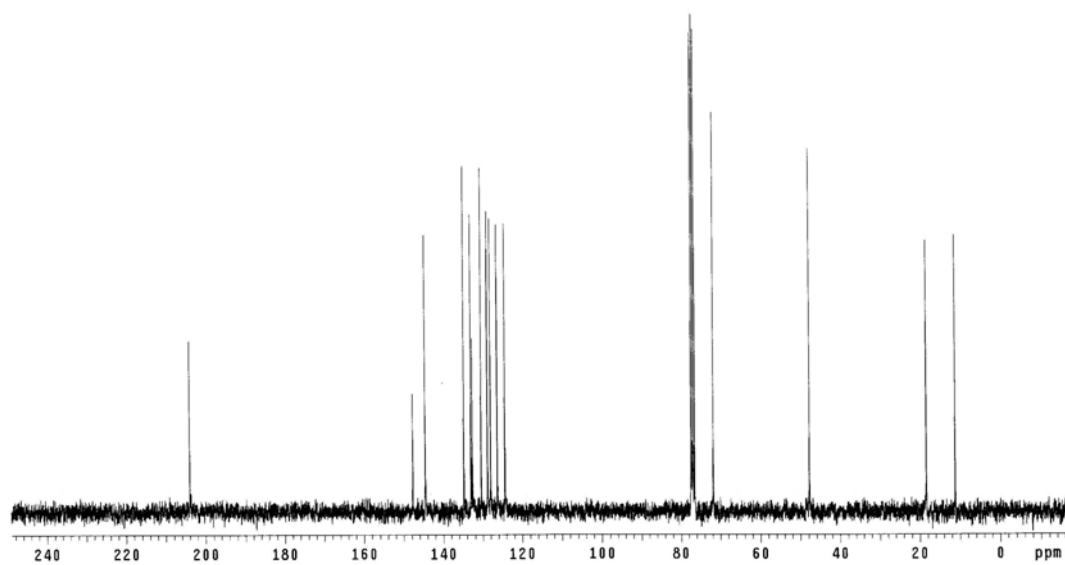



### 5-Hydroxy-4-methyl-1,5-bis-(4-nitro-phenyl)-pent-1-en-3-one (4b)

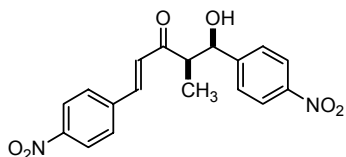

To a 13 mm × 100 mm test-tube were added Li<sub>2</sub>CO<sub>3</sub> (3.9 mg, 0.05 mmol, 10 mol%), (2-Fur)<sub>3</sub>P (13.9 mg, 0.06 mmol, 12 mol%), Rh(COD)<sub>2</sub>SbF<sub>6</sub> (13.9 mg, 0.025 mmol, 5 mol%), 4-nitro-benzaldehyde (75.6 mg, 0.5 mmol, 100 mol%) and CH<sub>2</sub>Cl<sub>2</sub> (0.5 mL, 1.0 M). The test-tube was sealed and the reaction system was purged with Ar(g) and H<sub>2</sub>(g) for 20 seconds each. The reaction system was placed under one atmosphere of hydrogen using a balloon and 1-(4-nitro-phenyl)-penta-1,4-dien-3-one (152.4 mg, 0.75 mmol, 150 mol%) was added to the reaction mixture. The reaction mixture was allowed to stir at ambient temperature for 12 hours, at which point the reaction mixture was directly deposited onto a column of silica and purified chromatographically (SiO<sub>2</sub>: EtOAc/hexane) to afford the title compound (78 mg, 0.22 mmol) as a white solid (44 % yield).

**TLC:** R<sub>f</sub> 0.3 (EtOAc/hexane, 1/2).

**<sup>1</sup>H NMR** (300 MHz, CDCl<sub>3</sub>): δ 8.29-8.26 (m, 5H), 7.74-7.71 (m, 2H), 7.59-7.56 (m, 2H), 6.91 (d, *J* = 15.9 Hz, 1H), 3.61 (d, *J* = 2.4 Hz, 1H), 3.14 (dq, *J* = 7.5, 2.7 Hz, 1H), 1.15 (d, *J* = 7.5 Hz, 3H).

**<sup>13</sup>C NMR** (75 MHz, CDCl<sub>3</sub>): δ 203.5, 149.2, 149.1, 147.5, 141.5, 140.4, 129.4, 127.7, 127.1, 124.5, 124.0, 123.8, 72.2, 51.0, 10.3.

**HRMS** Calcd. for C<sub>18</sub>H<sub>16</sub>NO<sub>6</sub> (M+1): 357.1087, Found: 357.1083.

**FTIR** (NaCl film): 3495, 3107, 2360, 1684, 1596, 1516, 1344, 1108, 848 cm<sup>-1</sup>.

**M.P.:** 140-142 °C.

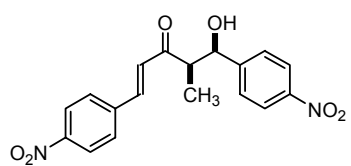

**(4b)**

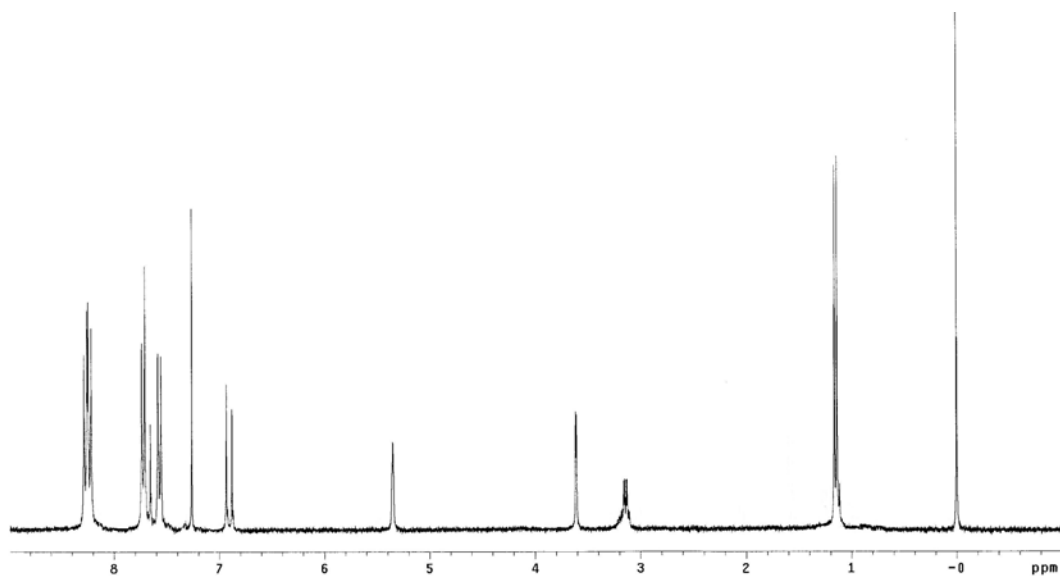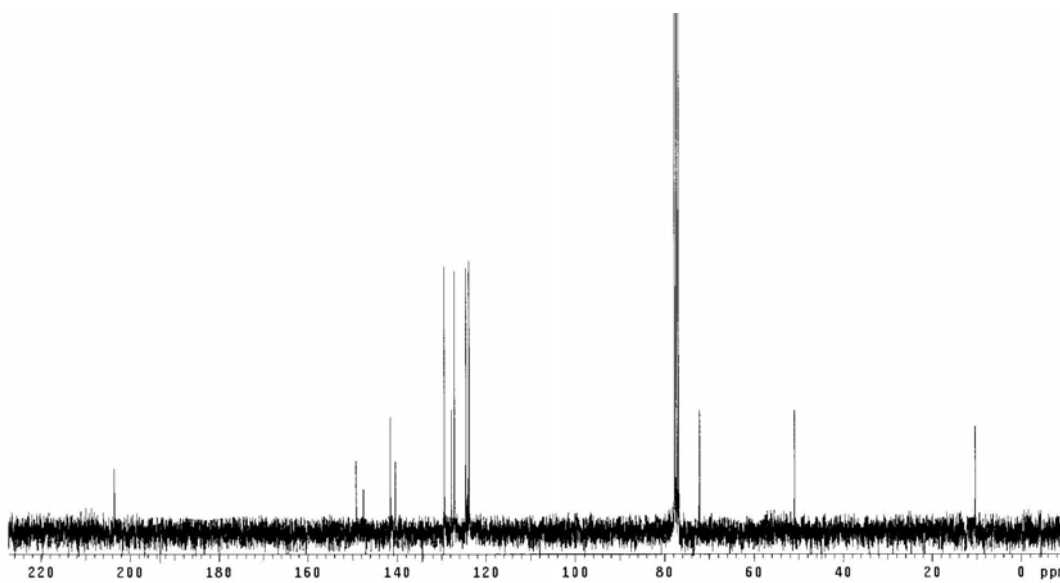

**5-Hydroxy-4-methyl-5-(4-nitro-phenyl)-1-phenyl-pent-1-en-3-one (4c)**

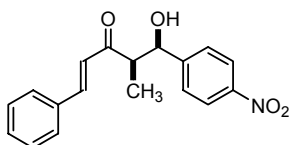

To a 13 mm × 100 mm test-tube were added Li<sub>2</sub>CO<sub>3</sub> (3.9 mg, 0.05 mmol, 10 mol%), (2-Fur)<sub>3</sub>P (13.9 mg, 0.06 mmol, 12 mol%), Rh(COD)<sub>2</sub>SbF<sub>6</sub> (13.9 mg, 0.025 mmol, 5 mol%), 4-nitro-benzaldehyde (75.6 mg, 0.5 mmol, 100 mol%) and CH<sub>2</sub>Cl<sub>2</sub> (0.5 mL, 1.0 M). The test-tube was sealed and the reaction system was purged with Ar(g) and H<sub>2</sub>(g) for 20 seconds each. The reaction system was placed under one atmosphere of hydrogen using a balloon and 1-phenyl-penta-1,4-dien-3-one (118.7 mg, 0.75 mmol, 150 mol%) was added to the reaction mixture. The reaction mixture was allowed to stir at ambient temperature for 12 hours, at which point the reaction mixture was directly deposited onto a column of silica and purified chromatographically (SiO<sub>2</sub>: EtOAc/hexane) to afford the title compound (78 mg, 0.025 mmol) as a viscous yellow oil (50 % yield).

**TLC:** R<sub>f</sub> 0.3 (EtOAc/hexane, 1/3).

**<sup>1</sup>H NMR** (300 MHz, CDCl<sub>3</sub>): δ 8.24-8.21 (m, 2H), 7.67 (d, *J* = 15.9 Hz, 1H), 7.59-7.56 (m, 4H), 7.45-7.41 (m, 3H), 6.80 (d, *J* = 15.9 Hz, 1H), 5.36-5.30 (m, 1H), 3.94 (br, 1H), 3.15 (dq, *J* = 7.5, 2.7 Hz, 1H), 1.12 (d, *J* = 7.5 Hz, 3H).

**<sup>13</sup>C NMR** (75 MHz, CDCl<sub>3</sub>): δ 204.3, 149.2, 144.6, 133.9, 131.1, 129.0, 128.5, 126.8, 124.0, 123.4, 72.0, 49.8, 10.1.

**HRMS** Calcd. for C<sub>18</sub>H<sub>17</sub>NO<sub>4</sub> (M+1): 312.1236, Found: 312.1241.

**FTIR** (NaCl film): 3445, 2941, 1678, 1603, 1575, 1517, 1449, 1345, 1184, 1107, 1051, 982, 852, 764, 707 cm<sup>-1</sup>.

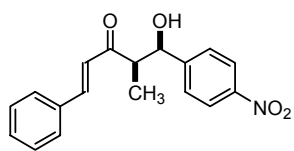

**(4c)**

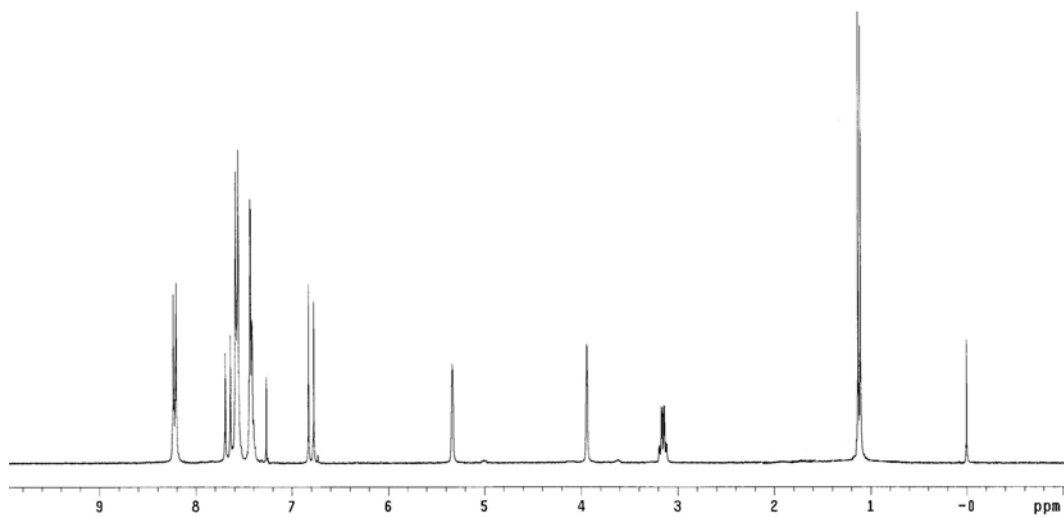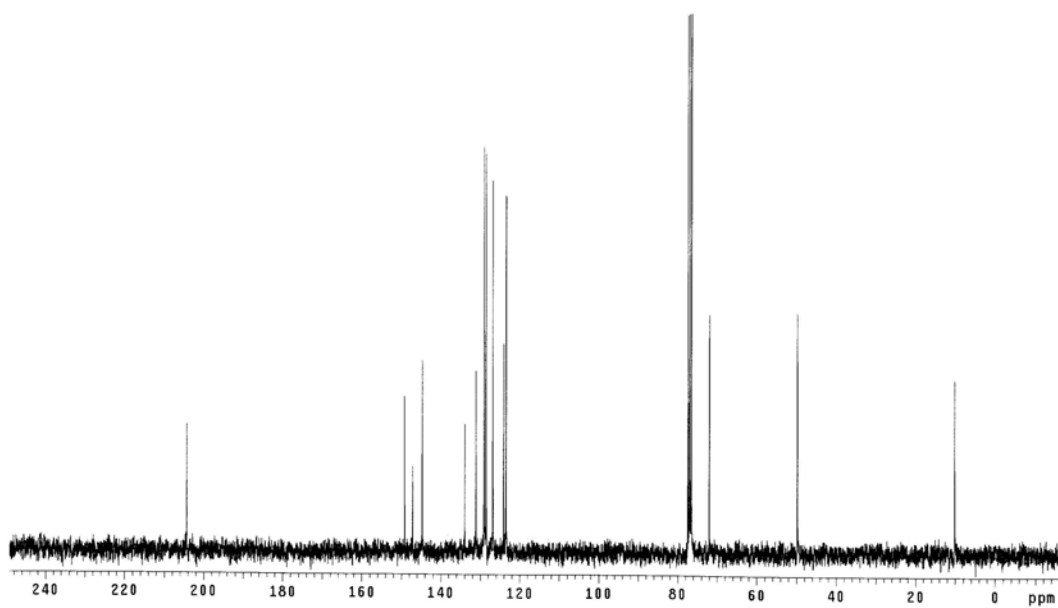

**5-Hydroxy-1-(4-methoxy-phenyl)-4-methyl-5-(4-nitro-phenyl)-pent-1-en-3-one (4d)**

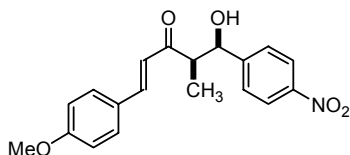

To a 13 mm × 100 mm test-tube were added Li<sub>2</sub>CO<sub>3</sub> (3.9 mg, 0.05 mmol, 10 mol%), (2-Fur)<sub>3</sub>P (13.9 mg, 0.06 mmol, 12 mol%), Rh(COD)<sub>2</sub>SbF<sub>6</sub> (13.9 mg, 0.025 mmol, 5 mol%), 4-nitro-benzaldehyde (75.6 mg, 0.5 mmol, 100 mol%) and CH<sub>2</sub>Cl<sub>2</sub> (0.5 mL, 1.0 M). The test-tube was sealed and the reaction system was purged with Ar(g) and H<sub>2</sub>(g) for 20 seconds each. The reaction system was placed under one atmosphere of hydrogen using a balloon and 1-(4-methoxy-phenyl)-penta-1,4-dien-3-one (141.2 mg, 0.75 mmol, 150 mol%) was added to the reaction mixture. The reaction mixture was allowed to stir at ambient temperature for 12 hours, at which point the reaction mixture was directly deposited onto a column of silica and purified chromatographically (SiO<sub>2</sub>: EtOAc/hexane) to afford the title compound (110 mg, 0.32 mmol) as a white solid (64 % yield).

**TLC:** R<sub>f</sub> 0.3 (EtOAc/hexane, 1/3).

**<sup>1</sup>H NMR** (300 MHz, CDCl<sub>3</sub>): δ 8.23-8.20 (m, 2H), 7.63 (d, *J* = 15.9 Hz, 1H), 7.59-7.52 (m, 4H), 6.95-6.92 (m, 2H), 6.67 (d, *J* = 15.9 Hz, 1H), 5.34-5.30 (m, 1H), 4.08 (br, 1H), 3.86 (s, 3H), 3.12 (dq, *J* = 7.5, 2.7 Hz, 1H), 1.10 (d, *J* = 7.5 Hz, 3H).

**<sup>13</sup>C NMR** (75 MHz, CDCl<sub>3</sub>): δ 204.3, 162.1, 149.3, 147.0, 144.5, 130.4, 126.8, 126.5, 123.4, 121.7, 114.5, 72.1, 55.4, 49.5, 10.2.

**HRMS** Calcd. for C<sub>19</sub>H<sub>19</sub>NO<sub>5</sub> (M+1): 342.1341, Found: 342.1344.

**FTIR** (NaCl film): 3448, 2935, 1596, 1571, 1511, 1458, 1422, 1345, 1255, 1172, 1108, 1028, 984, 853, 828, 705 cm<sup>-1</sup>.

**M.P.:** 98-90 °C.

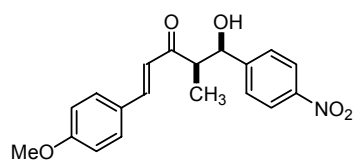

**(4d)**

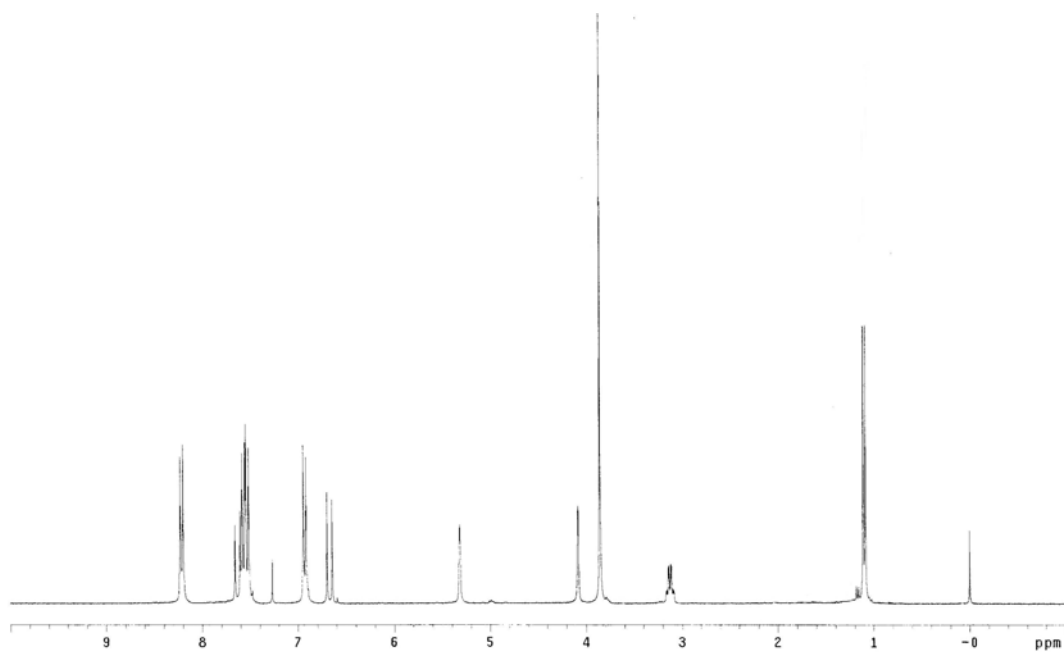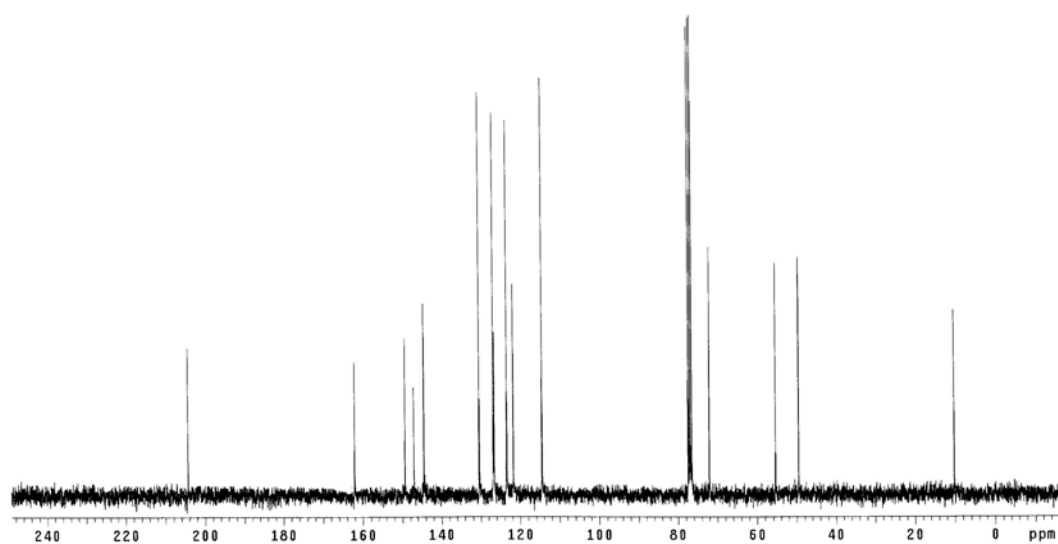

**1-(4-Dimethylamino-phenyl)-5-hydroxy-4-methyl-5-(4-nitro-phenyl)-pent-1-en-3-one (4e, 5a)**

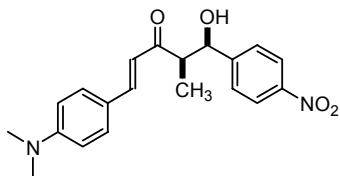

To a 13 mm × 100 mm test-tube were added Li<sub>2</sub>CO<sub>3</sub> (3.9 mg, 0.05 mmol, 10 mol%), (2-Fur)<sub>3</sub>P (13.9 mg, 0.06 mmol, 12 mol%), Rh(COD)<sub>2</sub>SbF<sub>6</sub> (13.9 mg, 0.025 mmol, 5 mol%), 4-nitro-benzaldehyde (75.6 mg, 0.5 mmol, 100 mol%) and CH<sub>2</sub>Cl<sub>2</sub> (0.5 mL, 1.0 M). The test-tube was sealed and the reaction system was purged with Ar(g) and H<sub>2</sub>(g) for 20 seconds each. The reaction system was placed under one atmosphere of hydrogen using a balloon and 1-(4-dimethylamino-phenyl)-penta-1,4-dien-3-one (150.9 mg, 0.75 mmol, 150 mol%) was added to the reaction mixture. The reaction mixture was allowed to stir at ambient temperature for 12 hours, at which point the reaction mixture was directly deposited onto a column of silica and purified chromatographically (SiO<sub>2</sub>: EtOAc/hexane) to afford the title compound (164 mg, 0.46 mmol) as a yellow solid (93 % yield).

**TLC:** R<sub>f</sub> 0.3 (EtOAc/hexane, 1/3).

**<sup>1</sup>H NMR** (300 MHz, CDCl<sub>3</sub>): δ 8.24-8.21 (m, 2H), 7.63 (d, *J* = 15.9 Hz, 1H), 7.59-7.56 (m, 2H), 7.49-7.46 (m, 2H), 6.58 (d, *J* = 15.9 Hz, 1H), 5.24-5.26 (m, 1H), 4.34 (br, 1H), 3.12 (dd, *J* = 7.5, 2.7 Hz 1H), 3.06 (s, 6H), 1.08 (d, *J* = 7.5 Hz, 3H).

**<sup>13</sup>C NMR** (75 MHz, CDCl<sub>3</sub>): δ 204.3, 152.3, 149.5, 146.6, 130.6, 126.8, 123.3, 121.3, 118.6, 111.7, 72.2, 48.9, 39.9, 10.4.

**HRMS** Calcd. for C<sub>20</sub>H<sub>22</sub>N<sub>2</sub>O<sub>4</sub> (M): 354.1580, Found: 354.1581.

**FTIR** (NaCl film): 3421, 2916, 1574, 1523, 1434, 1369, 1344, 1182, 1052, 853, 815 cm<sup>-1</sup>.

**M.P.:** 114-116 °C.

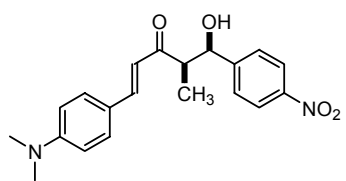

**(4e, 5a)**

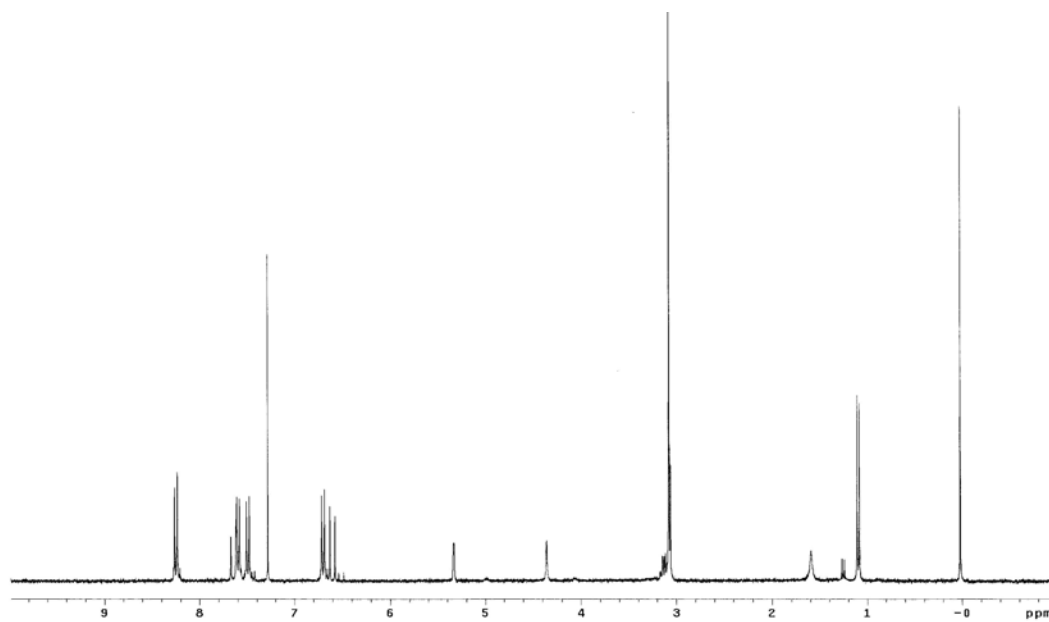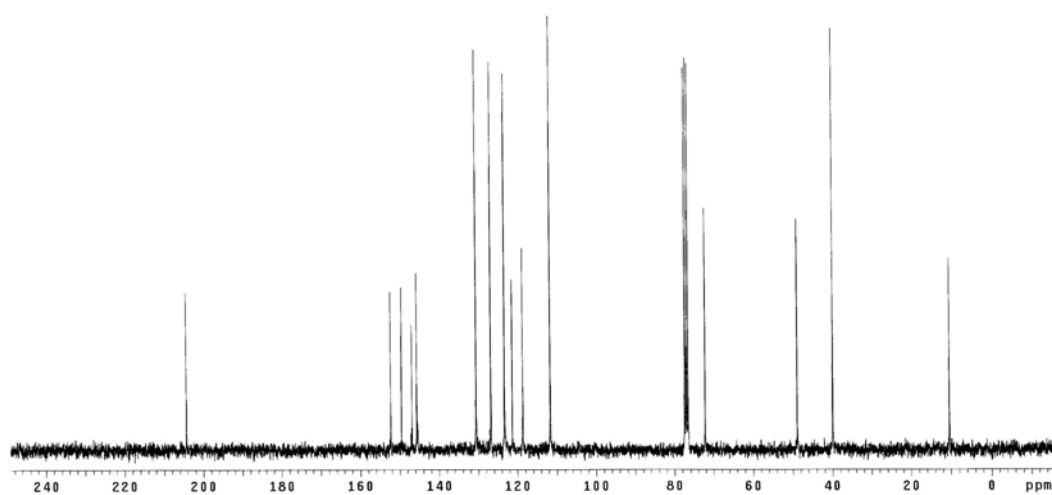



**6-Benzyloxy-1-(4-dimethylamino-phenyl)-5-hydroxy-4-methyl-hex-1-en-3-one (5b)**

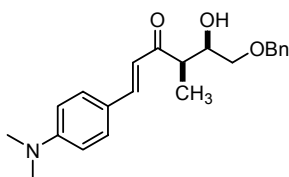

To a 13 mm × 100 mm test-tube were added  $\text{Li}_2\text{CO}_3$  (3.9 mg, 0.05 mmol, 10 mol%),  $(2\text{-Fur})_3\text{P}$  (13.9 mg, 0.06 mmol, 12 mol%),  $\text{Rh}(\text{COD})_2\text{SbF}_6$  (13.9 mg, 0.025 mmol, 5 mol%), benzyloxy-acetaldehyde (75.1 mg, 0.5 mmol, 100 mol%) and  $\text{CH}_2\text{Cl}_2$  (0.5 mL, 1.0 M). The test-tube was sealed and the reaction system was purged with  $\text{Ar}(\text{g})$  and  $\text{H}_2(\text{g})$  for 20 seconds each. The reaction system was placed under one atmosphere of hydrogen using a balloon and 1-(4-dimethylamino-phenyl)-penta-1,4-dien-3-one (201.3 mg, 1.0 mmol, 200 mol%) was added to the reaction mixture. The reaction mixture was allowed to stir at ambient temperature for 12 hours, at which point the reaction mixture was directly deposited onto a column of silica and purified chromatographically ( $\text{SiO}_2$ :  $\text{EtOAc}/\text{hexane}$ ) to afford the title compound (159 mg, 0.45 mmol) as a viscous yellow oil (90 % yield).

**TLC:**  $R_f$  0.3 ( $\text{EtOAc}/\text{hexane}$ , 1/3).

**$^1\text{H NMR}$**  (300 MHz,  $\text{CDCl}_3$ ):  $\delta$  7.57 (d,  $J = 15.9$  Hz, 1H), 7.46-7.43 (m, 2H), 7.33-7.26 (m, 5H), 6.68-6.65 (m, 2H), 6.58 (d,  $J = 15.9$  Hz, 1H), 4.53 (s, 2H), 4.19-4.10 (m, 1H), 3.58-3.46 (m, 2H), 3.14-2.98 (m, 8H), 1.23 (d,  $J = 6.9$  Hz, 3H).

**$^{13}\text{C NMR}$**  (75 MHz,  $\text{CDCl}_3$ ):  $\delta$  203.7, 152.0, 144.5, 137.9, 130.3, 128.3, 127.7, 127.6, 121.8, 120.0, 111.7, 73.3, 71.7, 70.9, 45.3, 40.0, 12.2.

**HRMS** Calcd. for  $\text{C}_{22}\text{H}_{27}\text{NO}_3$  ( $M+1$ ): 354.2069, Found: 354.2067.

**FTIR** (NaCl film): 3454, 2921, 1579, 1525, 1433, 1365, 1227, 1182, 1063, 984, 945, 815, 737, 698  $\text{cm}^{-1}$ .

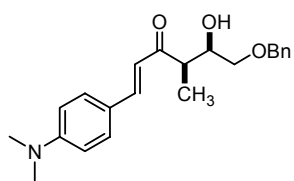

**(5b)**

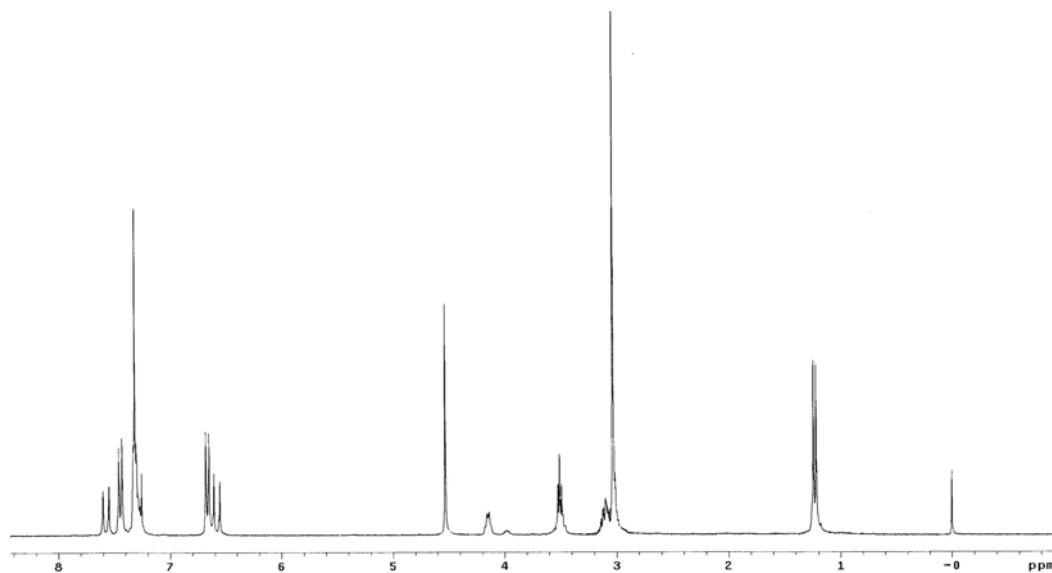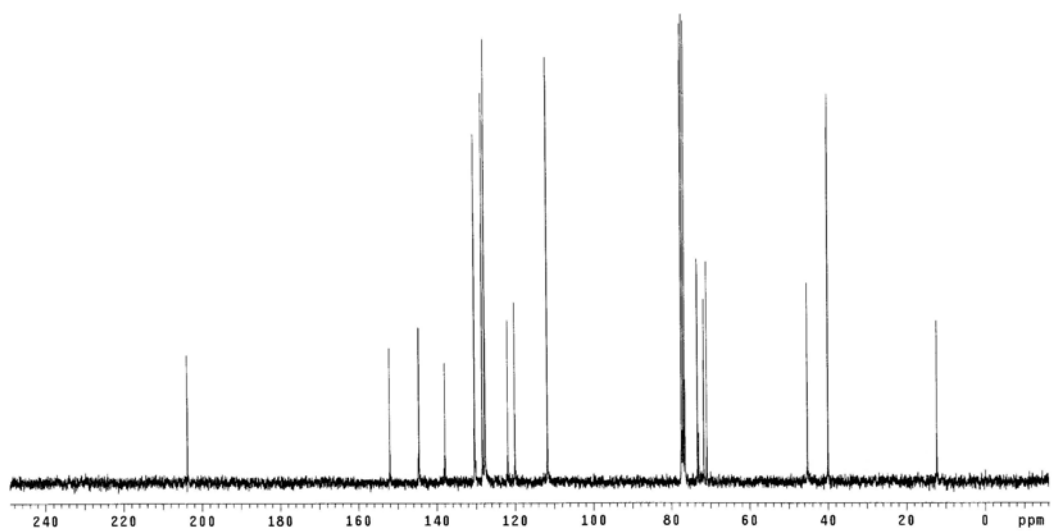

**2-[6-(4-Dimethylamino-phenyl)-2-hydroxy-3-methyl-4-oxo-hex-5-enyl]-isoindole-1,3-dione (5c)**

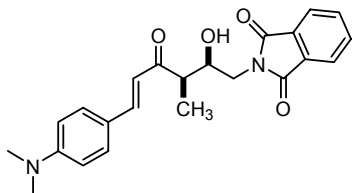

To a 13 mm × 100 mm test-tube were added  $\text{Li}_2\text{CO}_3$  (3.9 mg, 0.05 mmol, 10 mol%),  $(2\text{-Fur})_3\text{P}$  (13.9 mg, 0.06 mmol, 12 mol%),  $\text{Rh}(\text{COD})_2\text{SbF}_6$  (13.9 mg, 0.025 mmol, 5 mol%), (1,3-dioxo-1,3-dihydro-isoindol-2-yl)-acetaldehyde (94.6 mg, 0.5 mmol, 100 mol%) and  $\text{CH}_2\text{Cl}_2$  (0.5 mL, 1.0 M). The test-tube was sealed and the reaction system was purged with  $\text{Ar}(\text{g})$  and  $\text{H}_2(\text{g})$  for 20 seconds each. The reaction system was placed under one atmosphere of hydrogen using a balloon and 1-(4-dimethylamino-phenyl)-penta-1,4-dien-3-one (201.3 mg, 1.0 mmol, 200 mol%) was added to the reaction mixture. The reaction mixture was allowed to stir at ambient temperature for 12 hours, at which point the reaction mixture was directly deposited onto a column of silica and purified chromatographically ( $\text{SiO}_2$ : EtOAc/hexane) to afford the title compound (158 mg, 0.40 mmol) as a yellow solid (81 % yield).

**TLC:**  $R_f$  0.5 (EtOAc/hexane, 1/1).

**$^1\text{H NMR}$**  (300 MHz,  $\text{CDCl}_3$ ):  $\delta$  7.86-7.83 (m, 2H), 7.72-7.69 (m, 2H), 7.56 (d,  $J = 15.6$  Hz, 1H), 7.45-7.42 (m, 2H), 6.69-6.64 (m, 2H), 6.58 (d,  $J = 15.6$  Hz, 1H), 4.36-4.31 (m, 1H), 3.91 (dd,  $J = 14.1, 8.1$  Hz, 1H), 3.55 (dd,  $J = 14.1, 4.5$  Hz, 1H), 3.53 (br, 1H), 3.03 (s, 6H), 3.03-2.90 (m, 1H), 1.36 (d,  $J = 7.2$  Hz, 3H).

**$^{13}\text{C NMR}$**  (75 MHz,  $\text{CDCl}_3$ ):  $\delta$  203.3, 168.4, 152.0, 144.8, 133.9, 131.8, 130.3, 123.2, 121.6, 119.1, 111.6, 69.5, 46.0, 41.3, 39.9, 11.2.

**HRMS** Calcd. for  $\text{C}_{23}\text{H}_{24}\text{N}_2\text{O}_4$  ( $M+1$ ): 393.1814, Found: 393.1810.

**FTIR** (NaCl film): 3463, 2922, 2368, 1710, 1577, 1524, 1432, 1394, 1366, 1183, 1033, 816, 714  $\text{cm}^{-1}$ .

**M.P.:** 154-156  $^\circ\text{C}$ .

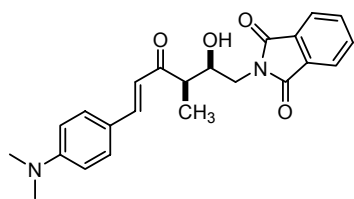

(5c)

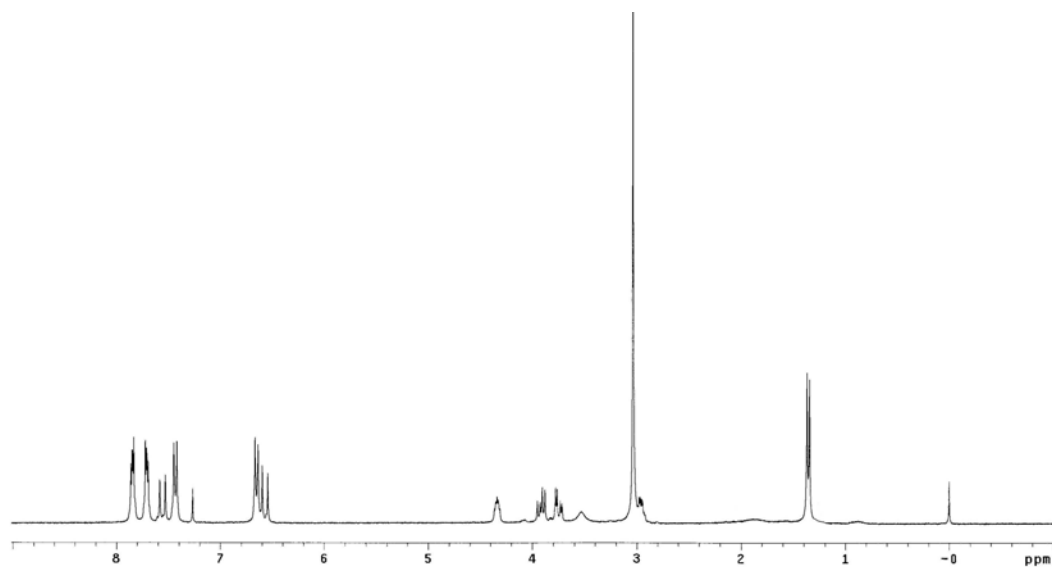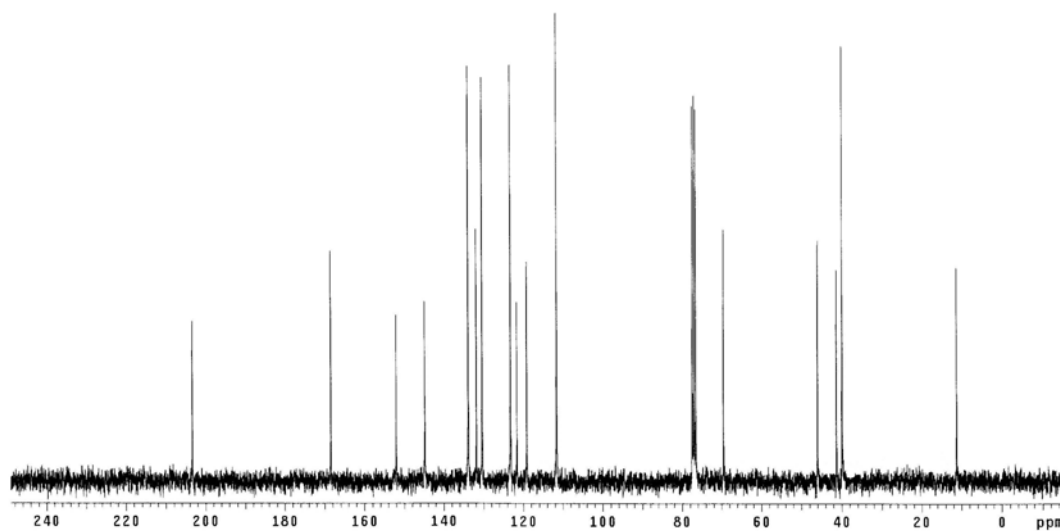

**5-(6-Bromo-pyridin-2-yl)-1-(4-dimethylamino-phenyl)-5-hydroxy-4-methyl-pent-1-en-3-one (5d)**

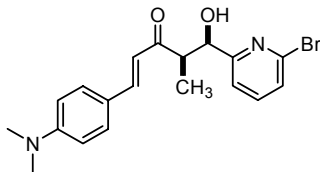

To a 13 mm × 100 mm test-tube were added Li<sub>2</sub>CO<sub>3</sub> (3.9 mg, 0.05 mmol, 10 mol%), (2-Fur)<sub>3</sub>P (13.9 mg, 0.06 mmol, 12 mol%), Rh(COD)<sub>2</sub>SbF<sub>6</sub> (13.9 mg, 0.025 mmol, 5 mol%), 6-bromo-pyridine-2-carbaldehyde (93.0 mg, 0.5 mmol, 100 mol%) and CH<sub>2</sub>Cl<sub>2</sub> (0.5 mL, 1.0 M). The test-tube was sealed and the reaction system was purged with Ar(g) and H<sub>2</sub>(g) for 20 seconds each. The reaction system was placed under one atmosphere of hydrogen using a balloon and 1-(4-dimethylamino-phenyl)-penta-1,4-dien-3-one (150.9 mg, 0.75 mmol, 150 mol%) was added to the reaction mixture. The reaction mixture was allowed to stir at ambient temperature for 12 hours, at which point the reaction mixture was directly deposited onto a column of silica and purified chromatographically (SiO<sub>2</sub>: EtOAc/hexane) to afford the title compound (169 mg, 0.43 mmol) as a yellow solid (87 % yield).

**TLC:** R<sub>f</sub> 0.3 (EtOAc/hexane, 1/3).

**<sup>1</sup>H NMR** (300 MHz, CDCl<sub>3</sub>): δ 7.62 (d, *J* = 15.9 Hz, 1H), 7.56-7.34 (m, 5H), 6.69-6.66 (m, 2H), 6.60 (d, *J* = 15.9 Hz, 1H), 5.19 (d, *J* = 3.0 Hz, 1H), 4.33 (br, 1H), 3.52 (dq, *J* = 7.2, 3.0 Hz, 1H), 3.04 (s, 6H), 1.05 (d, *J* = 7.2 Hz, 3H).

**<sup>13</sup>C NMR** (75 MHz, CDCl<sub>3</sub>): δ 204.7, 162.8, 152.1, 145.2, 140.9, 138.7, 130.4, 126.2, 121.6, 119.2, 111.6, 73.2, 47.5, 39.9, 10.7.

**HRMS** Calcd. for C<sub>19</sub>H<sub>21</sub>BrN<sub>2</sub>O<sub>2</sub> (M+1): 389.0865, Found: 389.0865.

**FTIR** (NaCl film): 3425, 2917, 2360, 1597, 1524, 1434, 1366, 1182, 1052, 985, 945, 813 cm<sup>-1</sup>.

**M.P.:** 125-127 °C.

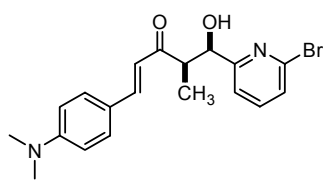

(5d)

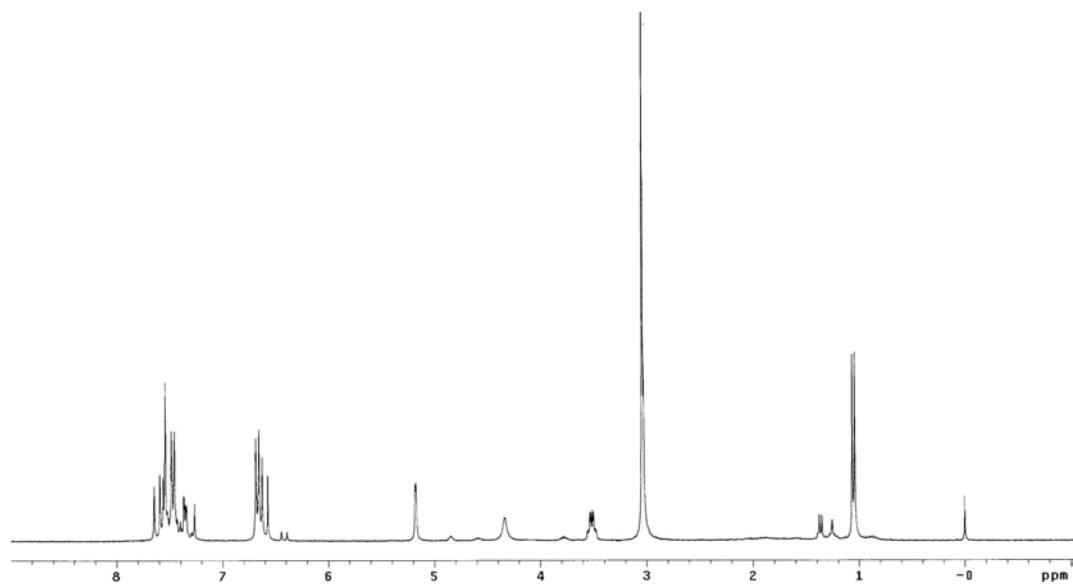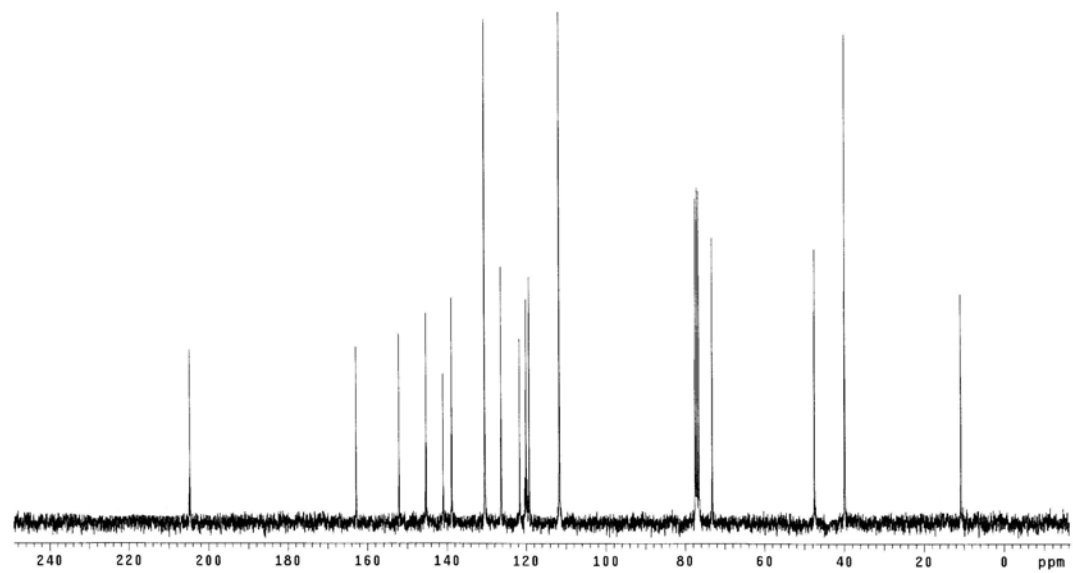

**1-(4-Dimethylamino-phenyl)-5-hydroxy-4-methyl-7-(2-nitro-phenyl)-hepta-1,6-dien-3-one (5e)**

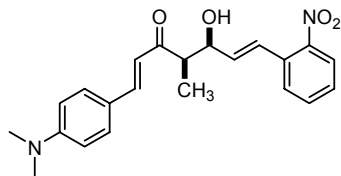

To a 13 mm × 100 mm test-tube were added  $\text{Li}_2\text{CO}_3$  (3.9 mg, 0.05 mmol, 10 mol%),  $(2\text{-Fur})_3\text{P}$  (13.9 mg, 0.06 mmol, 12 mol%),  $\text{Rh}(\text{COD})_2\text{SbF}_6$  (13.9 mg, 0.025 mmol, 5 mol%), 3-(2-nitro-phenyl)-propenal (88.6 mg, 0.5 mmol, 100 mol%) and  $\text{CH}_2\text{Cl}_2$  (0.5 mL, 1.0 M). The test-tube was sealed and the reaction system was purged with  $\text{Ar}(\text{g})$  and  $\text{H}_2(\text{g})$  for 20 seconds each. The reaction system was placed under one atmosphere of hydrogen using a balloon and 1-(4-dimethylamino-phenyl)-penta-1,4-dien-3-one (201.3 mg, 1.0 mmol, 200 mol%) was added to the reaction mixture. The reaction mixture was allowed to stir at ambient temperature for 18 hours, at which point the reaction mixture was directly deposited onto a column of silica and purified chromatographically ( $\text{SiO}_2$ : EtOAc/hexane) to afford the title compound (136 mg, 0.35 mmol) as a red oil (71 % yield).

**TLC:**  $R_f$  0.3 (EtOAc/hexane, 1/3).

**$^1\text{H NMR}$**  (300 MHz,  $\text{CDCl}_3$ ):  $\delta$  7.91-7.89 (m, 1H), 7.62 (d,  $J = 15.6$  Hz, 1H), 7.59-7.33 (m, 6H), 7.13 (d,  $J = 15.9$  Hz, 1H), 6.68-6.64 (m, 2H), 6.62 (d,  $J = 15.6$  Hz, 1H), 6.21 (dd,  $J = 15.9, 5.7$  Hz, 1H), 4.75 (dd,  $J = 5.7, 3.3$  Hz, 1H), 3.10 (dq,  $J = 15.6, 3.3$  Hz, 1H), 3.03 (s, 6H), 3.03-3.00 (br, 1H), 1.29 (d,  $J = 7.2$  Hz, 3H).

**$^{13}\text{C NMR}$**  (75 MHz,  $\text{CDCl}_3$ ):  $\delta$  204.2, 152.1, 147.7, 145.1, 135.1, 133.0, 132.7, 130.5, 128.8, 127.9, 126.1, 124.3, 121.6, 119.3, 111.7, 72.1, 47.9, 40.0, 11.4.

**HRMS** Calcd. for  $\text{C}_{22}\text{H}_{24}\text{N}_2\text{O}_4$  ( $M+1$ ): 381.1814 ; Found: 381.1812

**FTIR** (NaCl film): 3424, 2926, 2359, 1577, 1523, 1434, 1344, 1182, 1168, 1053, 970, 946, 860, 815, 742  $\text{cm}^{-1}$ .

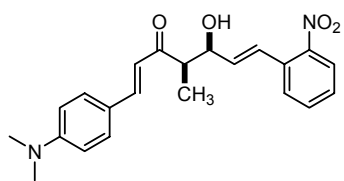

(5e)

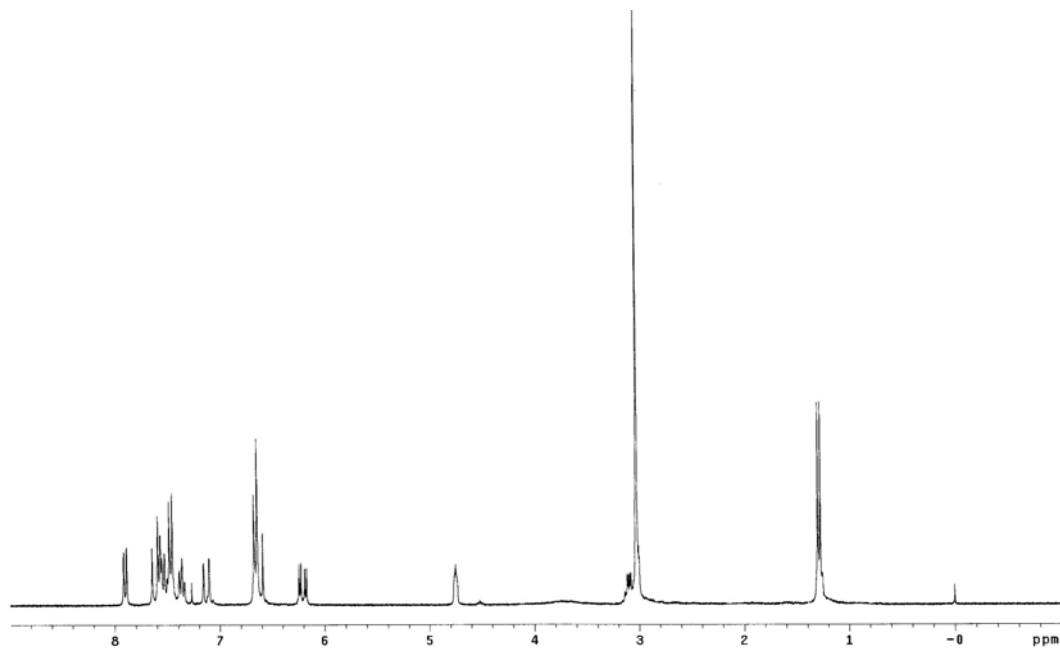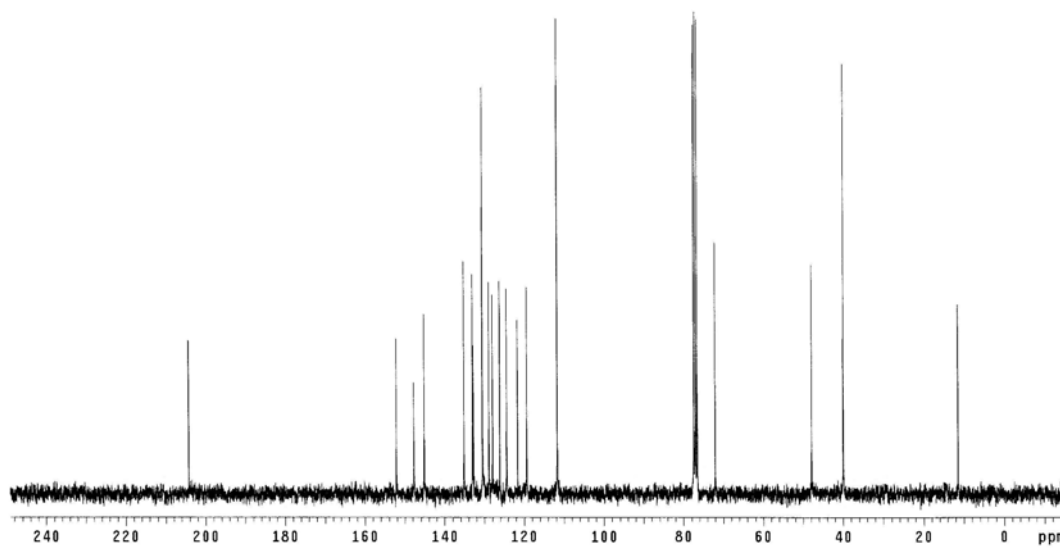



### 1-Benzyloxy-3-methyl-hept-5-ene-2,4-diol (**6a**)

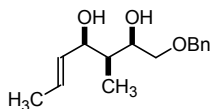

A solution of  $\text{Et}_3\text{B}$  (1.0M in hexane, 0.46 mL, 0.46 mmol, 119 mol%) was added to a mixture of dry THF (1.5 mL) and MeOH (0.6 mL) at ambient temperature under nitrogen. After 1 hour, the mixture was cooled to  $-78^\circ\text{C}$  followed by the enone **3b** (96 mg, 0.39 mmol, 100 mol%) in THF (0.5 mL). The resulting solution was stirred for 1 hour. Then  $\text{NaBH}_4$  (18 mg, 0.46 mmol, 120 mol%) was added, and the mixture was stirred for 5 hours. The reaction mixture was diluted with ether (15 mL), and treated with saturated  $\text{NH}_4\text{Cl}_{(\text{aq})}$  (15 mL). The layers were separated and the aqueous layer was extracted with ether (3x25 mL). The combined organic extracts were dried ( $\text{MgSO}_4$ ) and concentrated. The residue was azeotroped a few times with MeOH until boron-containing compounds were removed. Flash chromatography ( $\text{SiO}_2$ : EtOAc/hexane) afforded the title compound (96 mg, 0.38 mmol) as colorless oil (98 % yield).

**TLC**:  $R_f$  0.4 (EtOAc/hexane, 1/2).

**$^1\text{H NMR}$**  (300 MHz,  $\text{CDCl}_3$ ):  $\delta$  7.38-7.26 (m, 5H), 5.74 (ddq,  $J = 15.3, 6.3, 1.2$  Hz, 1H), 5.51 (ddq,  $J = 15.3, 6.0, 1.5$  Hz, 1H), 4.55 (d,  $J = 1.2$ , 2H), 4.34-4.26 (m, 1H), 4.10-4.02 (m, 1H), 3.54-3.44 (m, 2H), 2.85 (br, 1H), 2.62 (br, 1H), 1.70 (dd,  $J = 6.3, 1.5$  Hz, 3H), 1.69-1.63 (m, 1H), 0.92 (d,  $J = 7.2$  Hz, 3H).

**$^{13}\text{C NMR}$**  (75 MHz,  $\text{CDCl}_3$ ):  $\delta$  137.8, 132.2, 128.4, 127.7, 126.6, 76.1, 73.7, 73.4, 72.7, 39.9, 17.7, 6.4.

**HRMS** Calcd. for  $\text{C}_{15}\text{H}_{22}\text{O}_3$  ( $M+1$ ): 251.1647, Found: 251.1648.

**FTIR** (NaCl film): 3395, 3029, 2968, 2914, 2858, 1670, 1496, 1453, 1377, 1253, 1094, 966, 736, 698  $\text{cm}^{-1}$ .

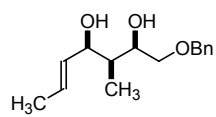

**(6a)**

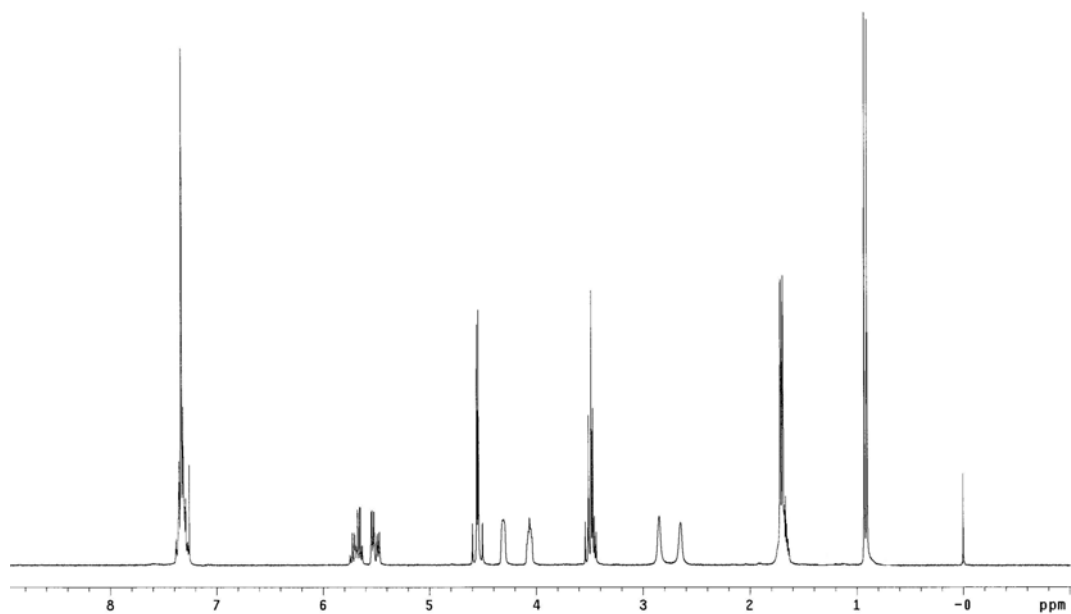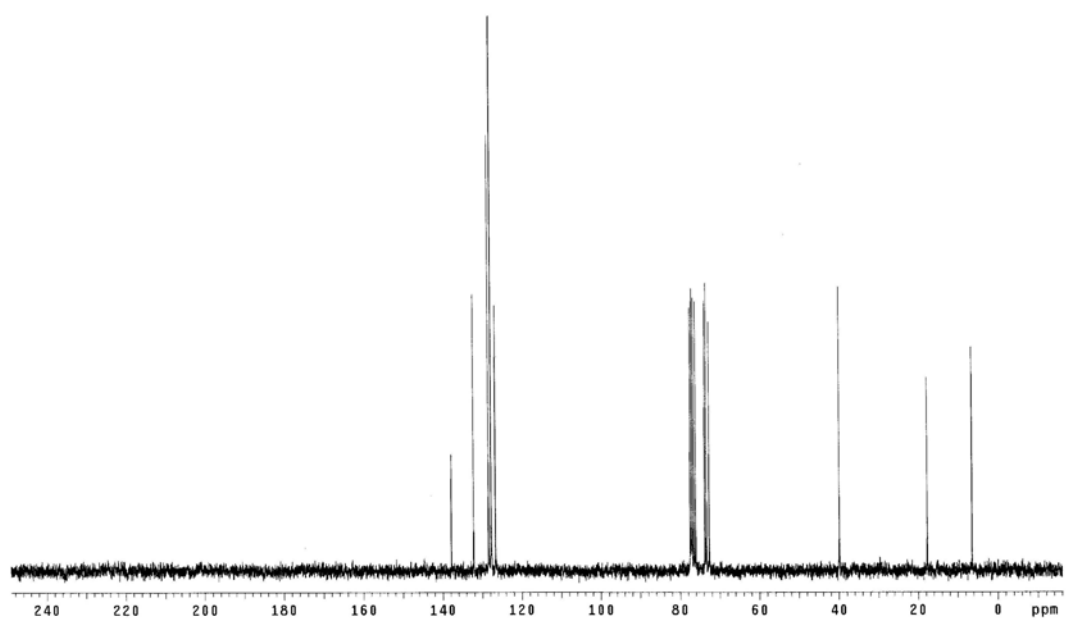

### 1-Benzyloxy-3-methyl-hept-5-ene-2,4-diol (6b)

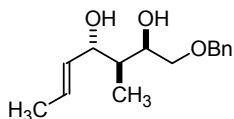

A solution of  $\text{Me}_4\text{NBH}(\text{OAc})_3$  (530 mg, 2.02 mmol, 1010 mol%) in AcOH (2.5 mL) and MeCN (2.5 mL) was prepared under Ar and stirred at ambient temperature for 20 min. The mixture was cooled to  $-30\text{ }^\circ\text{C}$ . A solution of the enone **3b** (50 mg, 0.20 mmol, 100 mol%) in MeCN (2.5 mL) at  $0\text{ }^\circ\text{C}$  was added dropwise via cannular over 10 min. The resulting mixture was allowed to warm to  $-20\text{ }^\circ\text{C}$  and stirred for 24 hours.  $\text{CH}_2\text{Cl}_2$  was added to the reaction mixture, and then a saturated aqueous  $\text{NaHCO}_3$  solution was slowly added. After 45 min at ambient temperature, the aqueous phase was extracted with  $\text{CH}_2\text{Cl}_2$  (3 times). The organic phases were dried ( $\text{MgSO}_4$ ), filtered, and evaporated, and the residue was purified by flash chromatography ( $\text{SiO}_2$ : EtOAc/hexane) to afford the title compound (47 mg, 19  $\mu\text{mol}$ ) as a colorless oil (94 % yield).

**TLC:**  $R_f$  0.4 (EtOAc/hexane, 1/2).

**$^1\text{H NMR}$**  (300 MHz,  $\text{CDCl}_3$ ):  $\delta$  7.38-7.27 (m, 5H), 5.68 (ddq,  $J = 15.3, 6.3, 1.3\text{ Hz}$ , 1H), 5.45 (ddq,  $J = 15.3, 7.8, 1.5\text{ Hz}$ , 1H), 4.57 (d,  $J = 5.4$ , 2H), 4.10-4.04 (m, 1H), 3.63 (dd,  $J = 9.6, 2.7\text{ Hz}$ , 1H), 3.46 (dd,  $J = 9.3, 7.2\text{ Hz}$ , 1H), 3.28 (br, 2H), 1.74-1.68 (m, 1H), 1.71 (dd,  $J = 6.3, 1.5\text{ Hz}$ , 3H), 0.77 (d,  $J = 6.9\text{ Hz}$ , 3H).

**$^{13}\text{C NMR}$**  (75 MHz,  $\text{CDCl}_3$ ):  $\delta$  137.8, 132.3, 128.6, 128.5, 127.8, 127.7, 75.0, 73.4, 72.7, 41.0, 29.7, 17.7, 12.8.

**HRMS** Calcd. for  $\text{C}_{15}\text{H}_{22}\text{O}_3$  ( $M+1$ ): 251.1647, Found: 251.1648.

**FTIR** (NaCl film): 3385, 3029, 2918, 1720, 1496, 1453, 1376, 1326, 1101, 1005, 968, 927, 738, 698  $\text{cm}^{-1}$ .

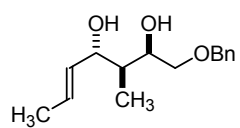

**(6b)**

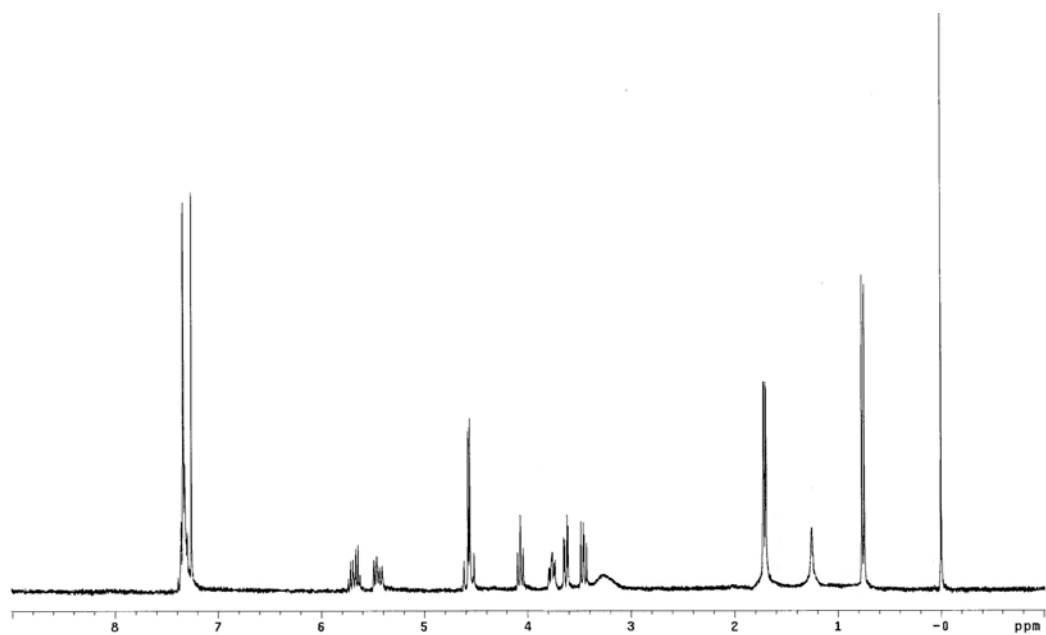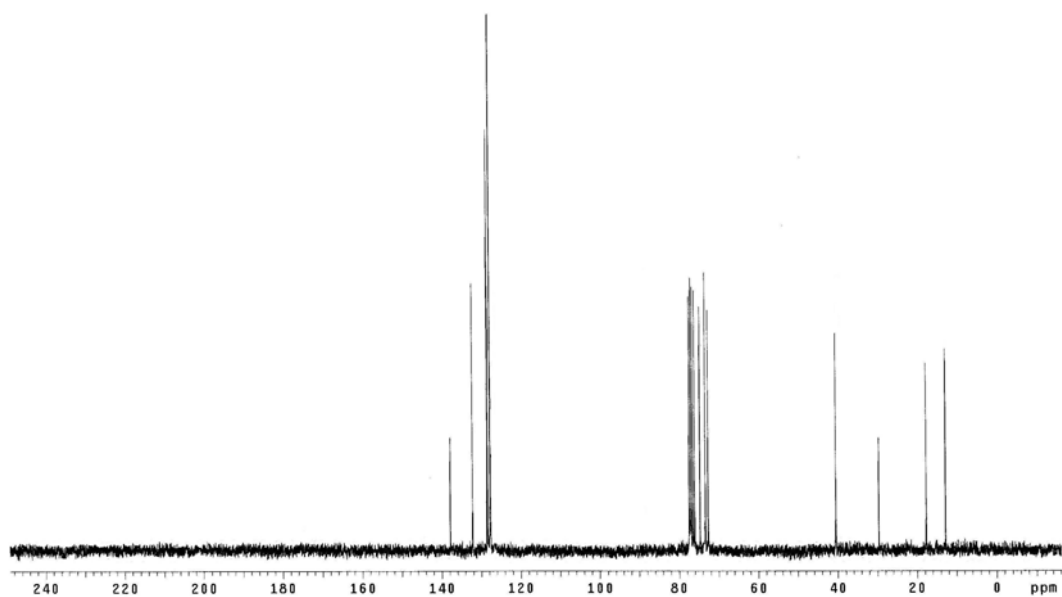

#### 4-Benzyloxymethyl-2,2,5-trimethyl-6-propenyl-[1,3]dioxane

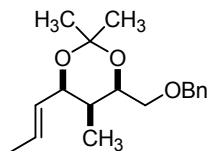

To a solution of 1-benzyloxy-3-methyl-hept-5-ene-2,4-diol **6a** (54 mg, 0.22 mmol, 100 mol%) in 2,2-dimethoxypropane (5 mL) at 0 °C was added *p*-TsOH•H<sub>2</sub>O (2 mg, 0.01 mmol, 5 mol%). After 3 hours at ambient temperature, the reaction mixture was quenched with saturated NaHCO<sub>3(aq.)</sub>, extracted with EtOAc (3 times), The organic phases were dried (MgSO<sub>4</sub>), filtered, and evaporated, and the residue was purified by flash chromatography (SiO<sub>2</sub>: EtOAc/hexane) to afford the title compound (58 mg, 0.20 mmol) as a colorless oil (91 % yield).

**TLC:** R<sub>f</sub> 0.6 (EtOAc/hexane, 1/10).

**<sup>1</sup>H NMR** (300 MHz, CDCl<sub>3</sub>): δ 7.35-7.26 (m, 5H), 5.70 (ddq, *J* = 15.3, 6.6, 1.2 Hz, 1H), 5.47 (ddq, *J* = 15.3, 6.3, 1.5 Hz, 1H), 4.62 (d, *J* = 12, 1H), 4.48 (d, *J* = 12, 1H), 4.42 (ddd, *J* = 6.3, 5.7, 1.2, 1H), 4.21 (ddd, *J* = 6.6, 6.3, 2.4, 1H), 3.50 (dd, *J* = 9.9, 6.6, 1H), 3.41 (2.85 (dd, *J* = 9.9, 6.3, 1H), 1.71 (dd, *J* = 6.6, 1.5 Hz, 3H), 1.59-1.48 (m, 1H), 1.48 (s, 3H), 1.43 (s, 3H), 0.92 (d, *J* = 7.2 Hz, 3H).

**<sup>13</sup>C NMR** (75 MHz, CDCl<sub>3</sub>): δ 138.1, 129.9, 128.3, 127.7, 127.6, 127.3, 99.0, 74.0, 73.4, 71.8, 70.9, 34.3, 29.9, 19.6, 17.8, 5.4.

**HRMS** Calcd. for C<sub>18</sub>H<sub>26</sub>O<sub>3</sub> (M+1): 291.1960, Found: 291.1962.

**FTIR** (NaCl film): 2989, 2936, 1453, 1379, 1254, 1199, 1176, 1103, 1075, 1012, 967, 938, 735, 697 cm<sup>-1</sup>.

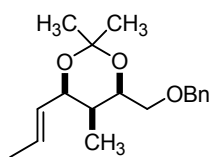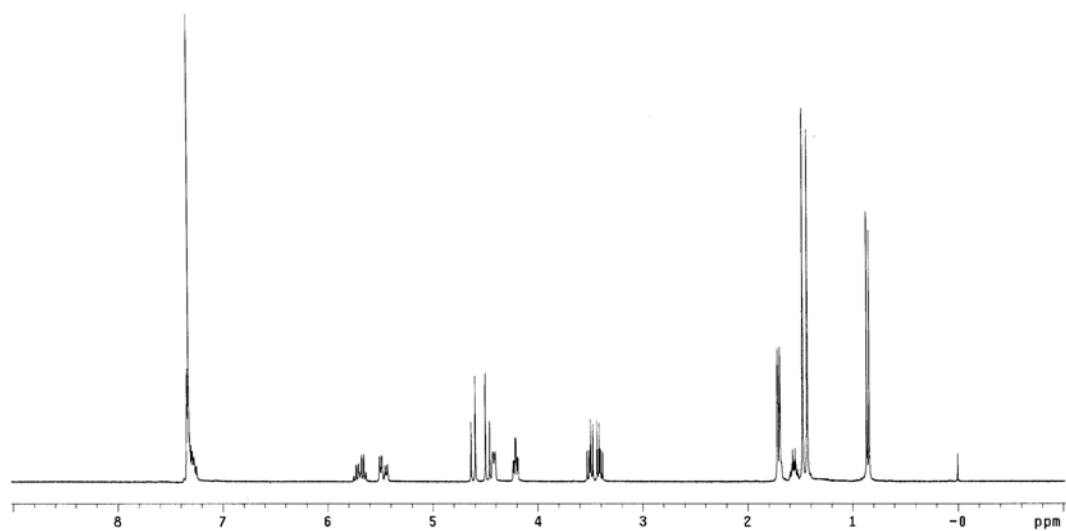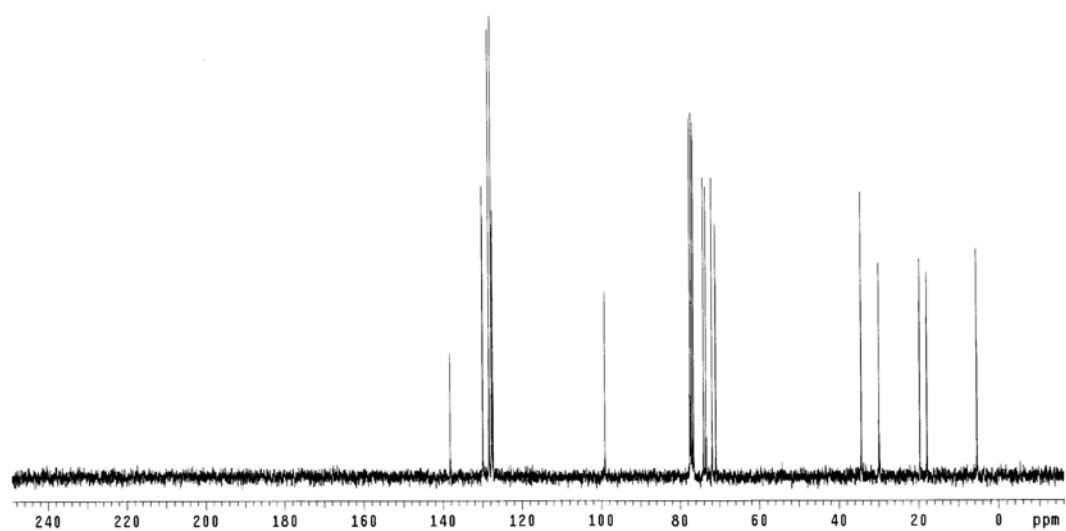

**6-Benzyloxymethyl-2,2,5-trimethyl-[1,3]dioxane-4-carbaldehyde (6c)**

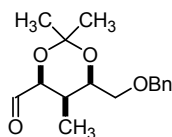

A solution of 4-benzyloxymethyl-2,2,5-trimethyl-6-propenyl-[1,3]dioxane (47 mg, 0.16 mmol, 100 mol%) in  $\text{CH}_2\text{Cl}_2$  (30 mL) at  $-78^\circ\text{C}$  was bubbled with  $\text{O}_3$  until blue color persisted.  $\text{N}_2$  was bubbled for 10 min and  $\text{PPh}_3$  (47 mg, 0.18 mmol, 113 mol%) was added to the reaction mixture, and stirred the reaction mixture overnight at ambient temperature. The reaction mixture was evaporated, and the residue was purified by flash chromatography ( $\text{SiO}_2$ : EtOAc/hexane) to afford the title compound (33 mg, 0.12 mmol) as a colorless oil (74 % yield).

**TLC:**  $R_f$  0.2 (EtOAc/hexane, 1/3).

**$^1\text{H NMR}$**  (300 MHz,  $\text{CDCl}_3$ ):  $\delta$  9.59 (s, 1H), 7.38-7.29 (m, 5H), 4.63 (d,  $J = 12.0$  Hz, 1H), 4.51 (d,  $J = 12.0$  Hz, 1H), 4.38 (d,  $J = 3.0$  Hz, 1H), 4.25 (ddd,  $J = 6.6, 6.3, 2.4$  Hz, 1H), 3.53 (dd,  $J = 9.6, 6.3$  Hz, 1H), 3.44 (dd,  $J = 9.6, 6.6$  Hz, 1H), 2.14 (ddq,  $J = 6.6, 3.0, 2.4$  Hz, 1H), 1.54 (s, 3H), 1.50 (s, 3H), 0.89 (d,  $J = 6.6$  Hz, 3H).

**$^{13}\text{C NMR}$**  (75 MHz,  $\text{CDCl}_3$ ):  $\delta$  202.2, 137.9, 128.4, 127.7, 99.7, 78.2, 73.5, 71.3, 70.1, 31.2, 29.5, 19.1, 6.3.

**HRMS** Calcd. for  $\text{C}_{16}\text{H}_{22}\text{O}_4$  ( $M+1$ ): 279.1596, Found: 279.1598.

**FTIR** (NaCl film): 3454, 2933, 2869, 2359, 1720, 1626, 1453, 1374, 1274, 1201, 1099, 739, 698.

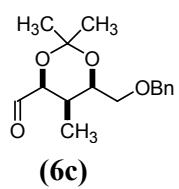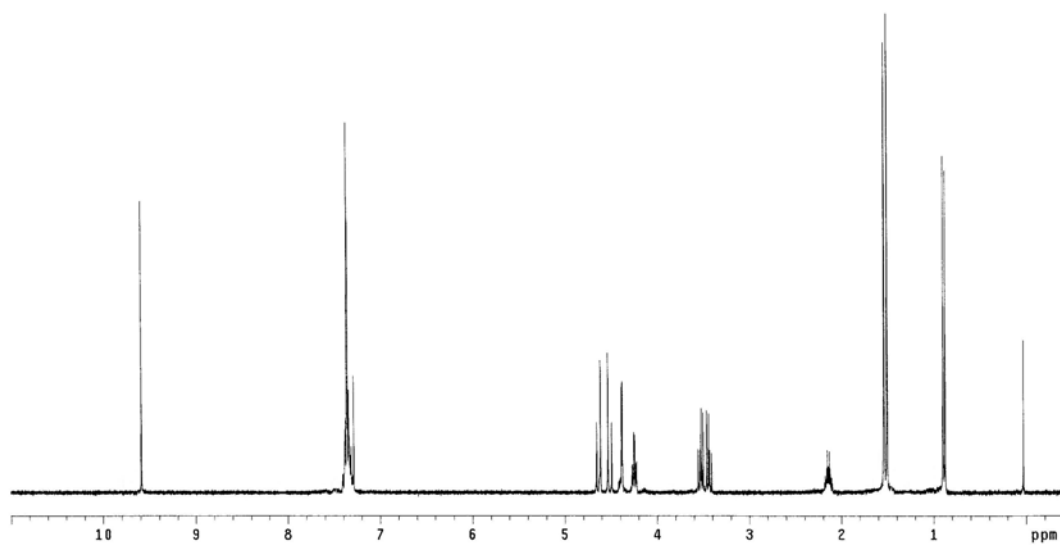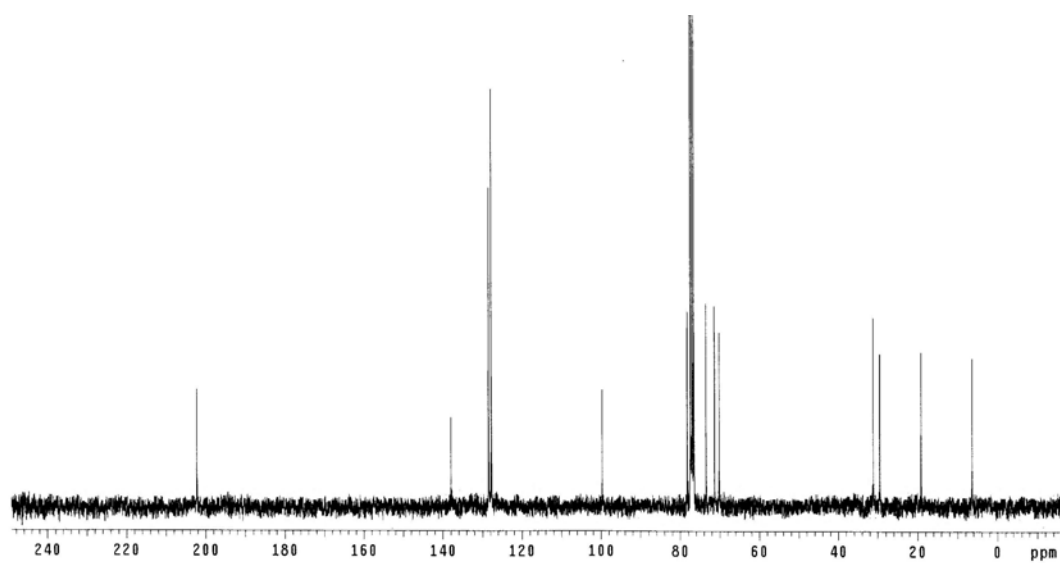



## 2-Benzyloxymethyl-3,6-dimethyl-2,3-dihydro-pyran-4-one (6d)

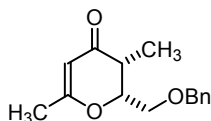

A 25 mL Schlenk tube was charged with PdCl<sub>2</sub> (7 mg, 0.04 mmol, 10 mol%), CuCl (4 mg, 0.04 mmol, 10 mol%), and Na<sub>2</sub>HPO<sub>4</sub> (7 mg, 0.04 mmol, 10 mol%) and evacuated and backfilled with oxygen (3 times, balloon). A solution of the enone **3b** (100 mg, 0.40 mmol, 100 mol%) in DME (3 mL) was added via cannula. The resulting mixture was heated to 50 °C and allowed to stir at this temperature for 12 hours. The reaction mixture was allowed to cool to ambient temperature, diluted with Et<sub>2</sub>O and filtered through a pad of silica, and concentrated *in vacuo* to give a crude residue that was further purified by flash column chromatography (SiO<sub>2</sub>: EtOAc/hexane) to afford the title compound (70 mg, 0.28 mmol) as a colorless oil (71 % yield).

**TLC:** R<sub>f</sub> 0.3 (EtOAc/hexane, 1/3).

**<sup>1</sup>H NMR** (300 MHz, CDCl<sub>3</sub>): δ 7.37-7.30 (m, 5H), 5.26 (s, 1H), 4.66-4.53 (m, 3H), 3.61 (dd, *J* = 10.5, 4.5 Hz, 1H), 3.79 (dd, *J* = 10.5, 7.2 Hz, 1H), 2.41 (dq, *J* = 7.2, 3.6 Hz, 1H), 2.02 (s, 3H), 1.03 (d, *J* = 7.2 Hz, 3H).

**<sup>13</sup>C NMR** (75 MHz, CDCl<sub>3</sub>): δ 196.6, 173.3, 137.5, 128.5, 127.9, 127.7, 103.7, 80.2, 73.5, 68.7, 40.8, 20.8, 10.0.

**HRMS** Calcd. for C<sub>15</sub>H<sub>18</sub>O<sub>8</sub> (M+1): 247.1344, Found: 247.1346.

**FTIR** (NaCl film): 2919, 2360, 1668, 1610, 1453, 1393, 1337, 1240, 1175, 1090, 970, 827, 739, 697 cm<sup>-1</sup>.

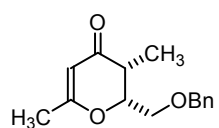

(6d)

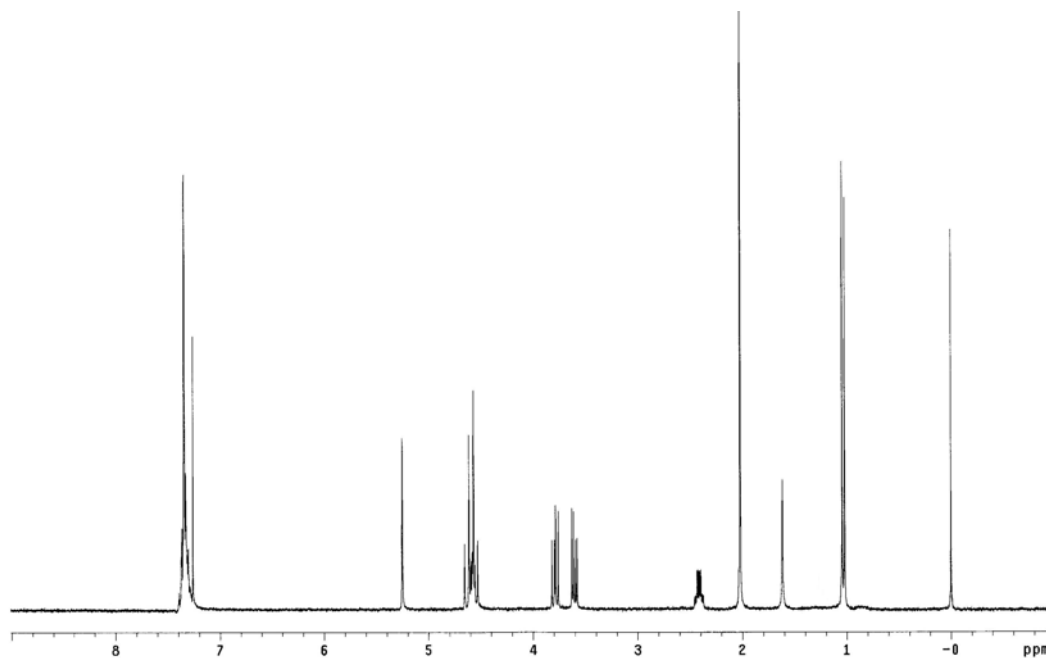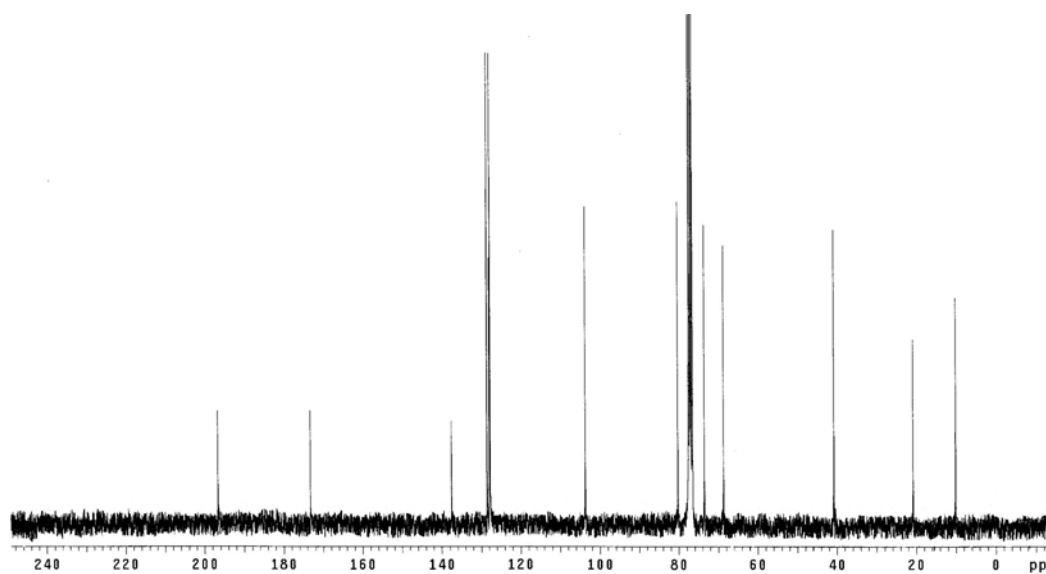

### **III. References**

- [1] RajanBabu, T. V.; Ayers, T. A.; Halliday, G. A.; You, K. K.; Calabrese, J. C. *J. Org. Chem.* **1997**, *62*, 6012.
- [2] (a) Brookhart, M.; Grant, B.; Volpe, A. F. Jr. *Organometallics* **1992**, *11*, 3920. (b) Reger, D. L.; Wright, T. D.; Little, C. A.; Lamba, J. J. S.; Smith, M. D. *Inorg. Chem.* **2001**, *40*, 3810. (c) Guzel, B.; Omary, M. A.; Fackler, J. P. Jr.; Akgerman, A. *Inorg. Chim. Acta* **2001**, *325*, 45.
- [3] Nenajdenko, V. G.; Lebedev, M. V.; Balenkova, E. S. *Tetrahedron* **2001**, *57*, 9017.
- [4] Birtwistle, D. H.; Brown, J. M.; Foxton, M. W. *Tetrahedron* **1988**, *44*, 7309.
- [5] Takacs, J. M.; Jiang, X. T.; Leonov, A. P. *Tetrahedron Lett.* **2003**, *44*, 7075.
